# Supplementary material for: METTL4-mediated nuclear N6-deoxyadenosine methylation promotes metastasis through activating multiple metastasis-inducing targets
Source: PubMed Central journal article supplement (PMC9716733; doi:10.1186/s13059-022-02819-3), 2022-12-02
Supplement: 13059_2022_2819_MOESM1_ESM.pdf [file 13059_2022_2819_MOESM1_ESM.pdf]

## Supplementary Information

**METTL4-mediated nuclear N6-deoxyadenosine methylation promotes metastasis through activating multiple metastasis-inducing targets**

Kai-Wen Hsu<sup>1,2,3</sup>, Joseph Chieh-Yu Lai<sup>1,4</sup>, Jeng-Shou Chang<sup>1</sup>, Pei-Hua Peng<sup>1</sup>, Ching-Hui Huang<sup>1</sup>, Der-Yen Lee<sup>5</sup>, Yu-Cheng Tsai<sup>2</sup>, Chi-Jung Chung<sup>6</sup>, Han Chang<sup>7</sup>, Chao-Hsiang Chang<sup>8</sup>, Ji-Lin Chen<sup>9</sup>, See-Tong Pang<sup>10</sup>, Ziyang Hao<sup>11,12</sup>, Xiao-Long Cui<sup>11</sup>, Chuan He<sup>11,13</sup>, Kou-Juey Wu<sup>1\*</sup>

**\*Corresponding author. Email:** [wukj@cgmh.org.tw](mailto:wukj@cgmh.org.tw)

### **This file includes:**

Supplementary Figures (Figures S1-S6)

Legends to Supplementary Figures

# Supplementary Figures

## Figure S1

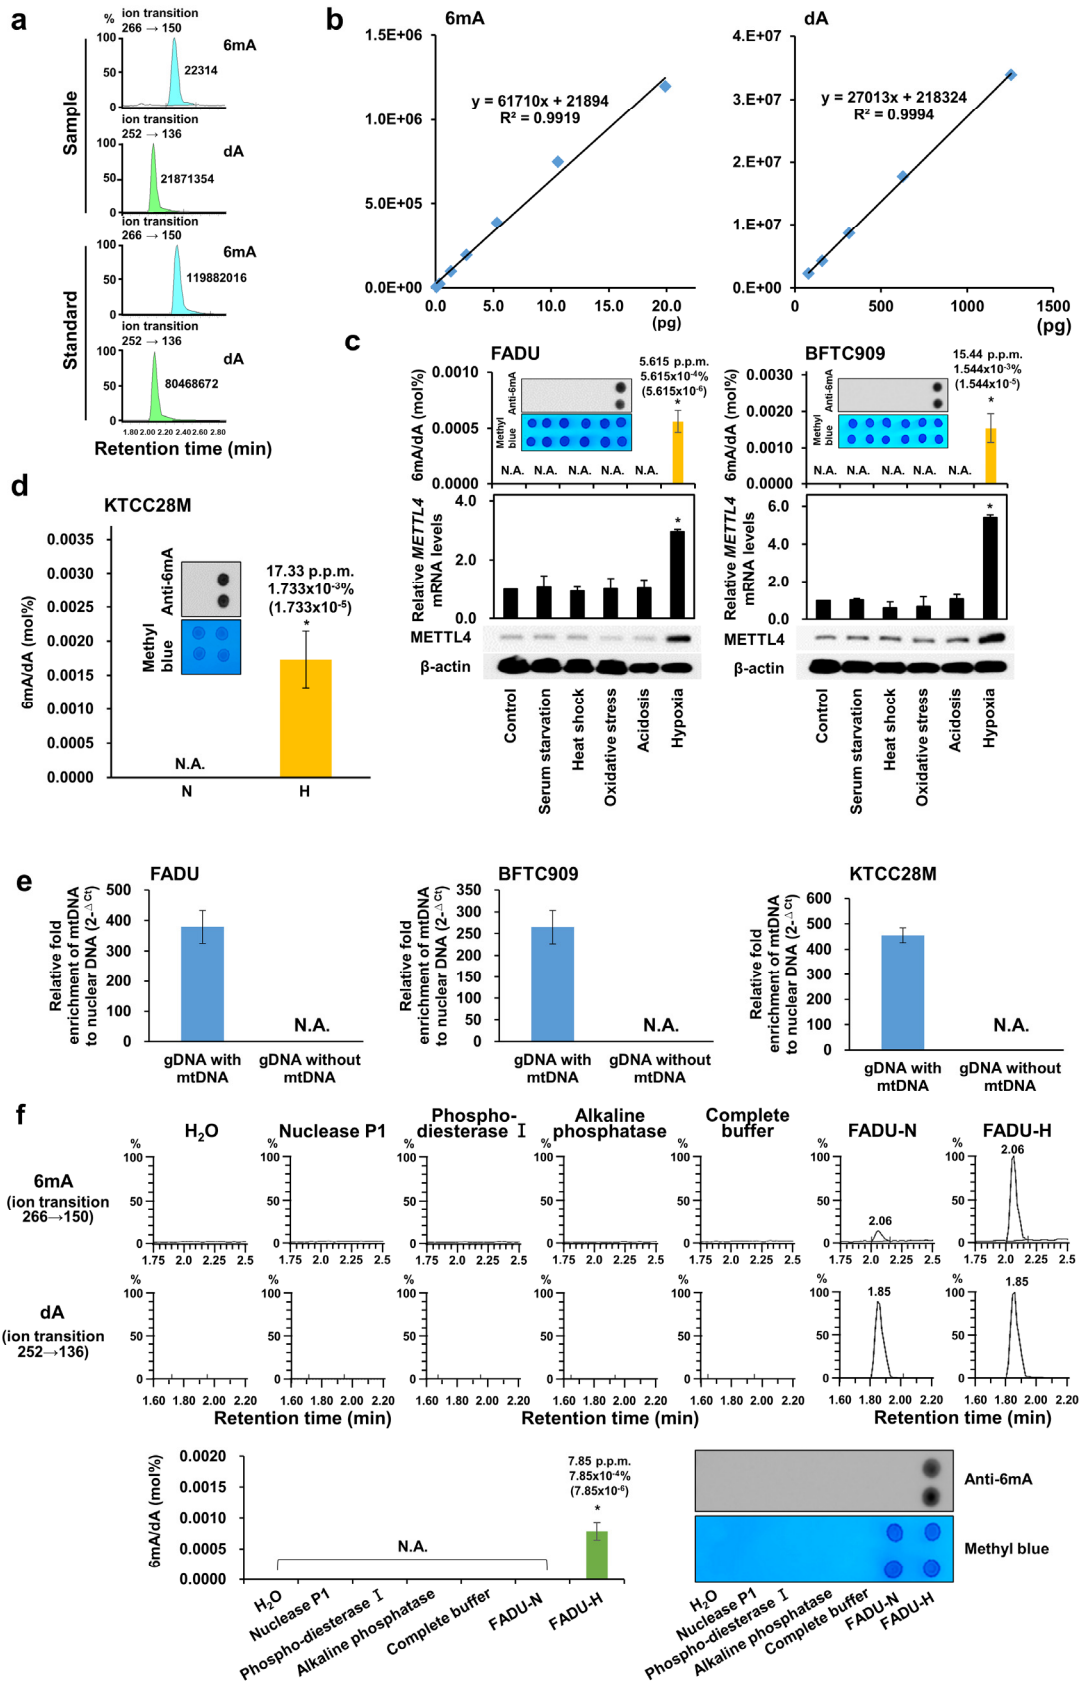

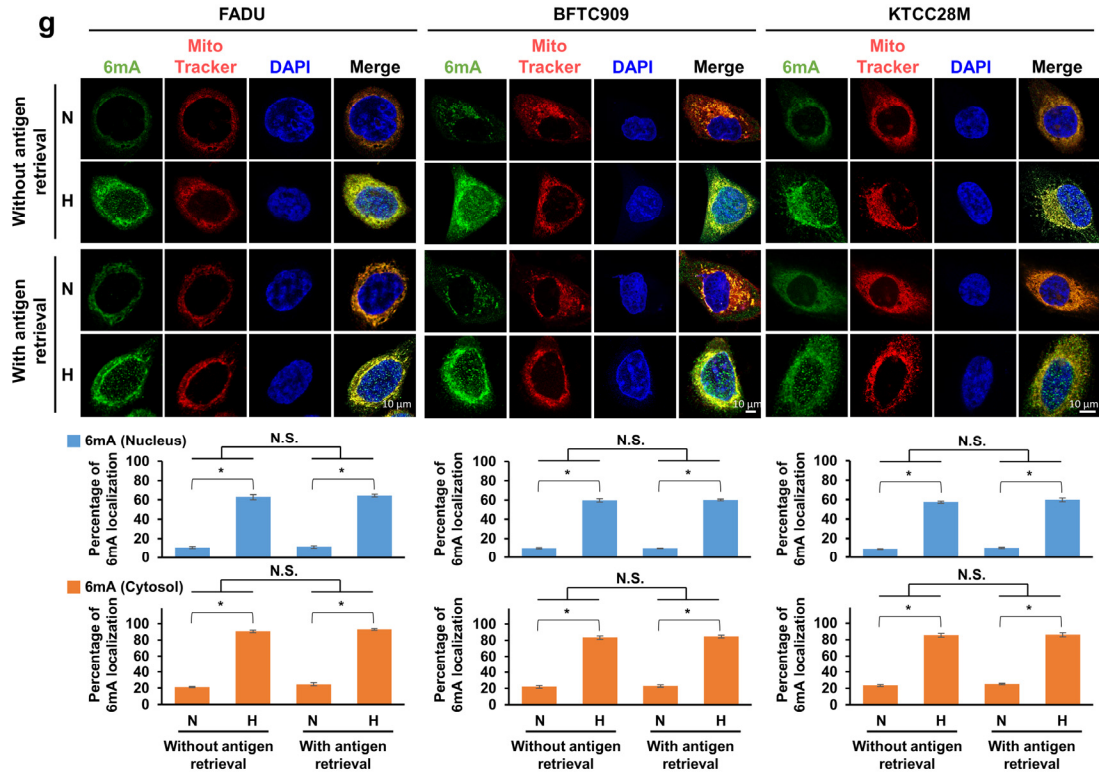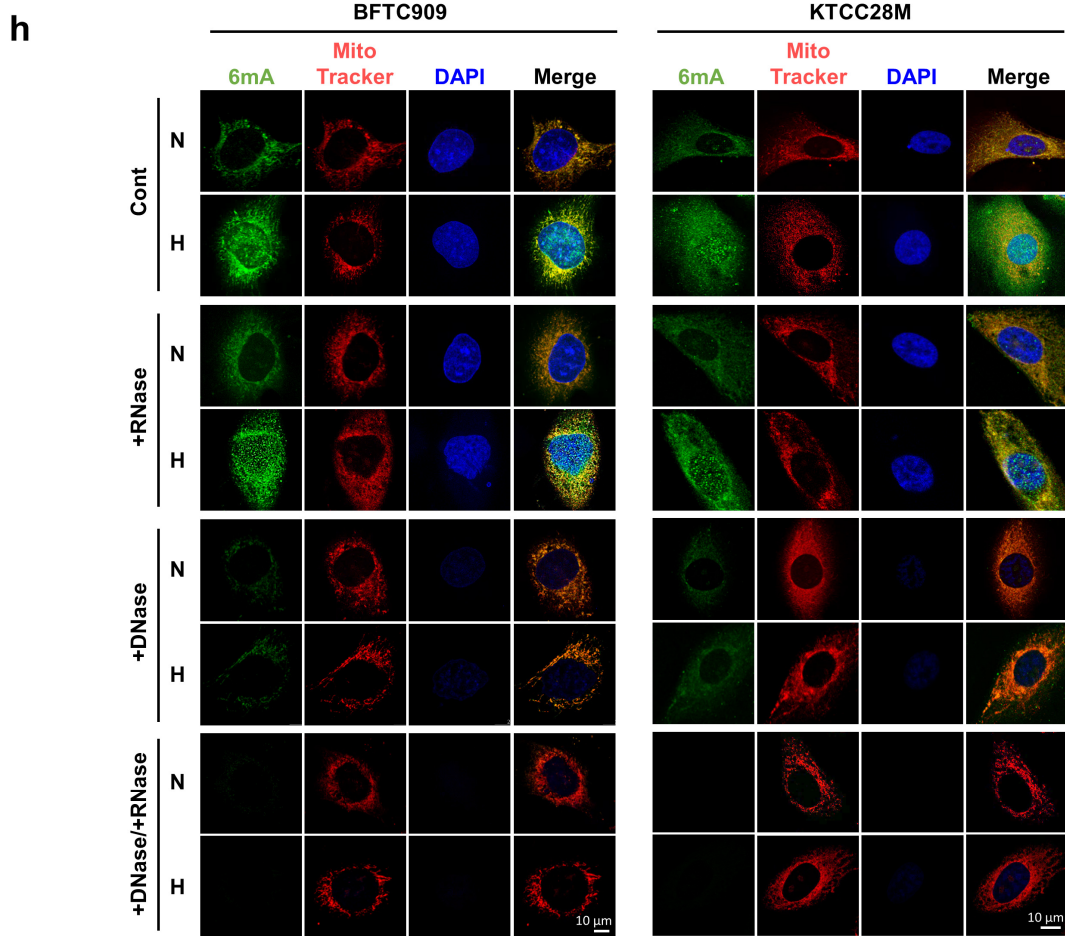

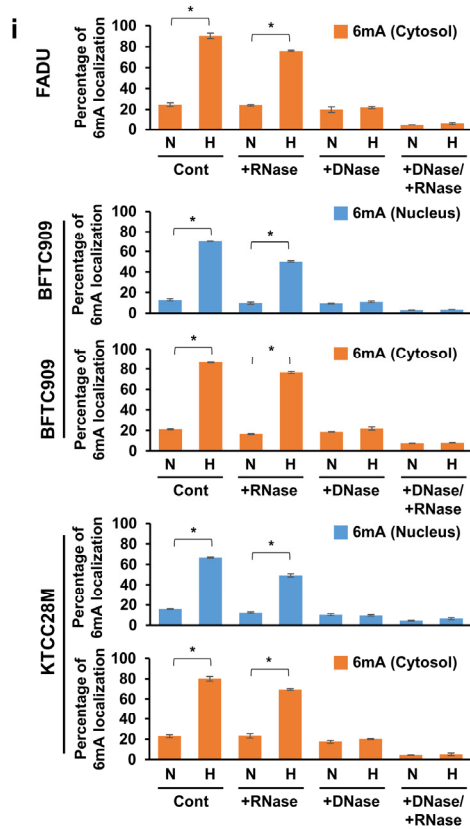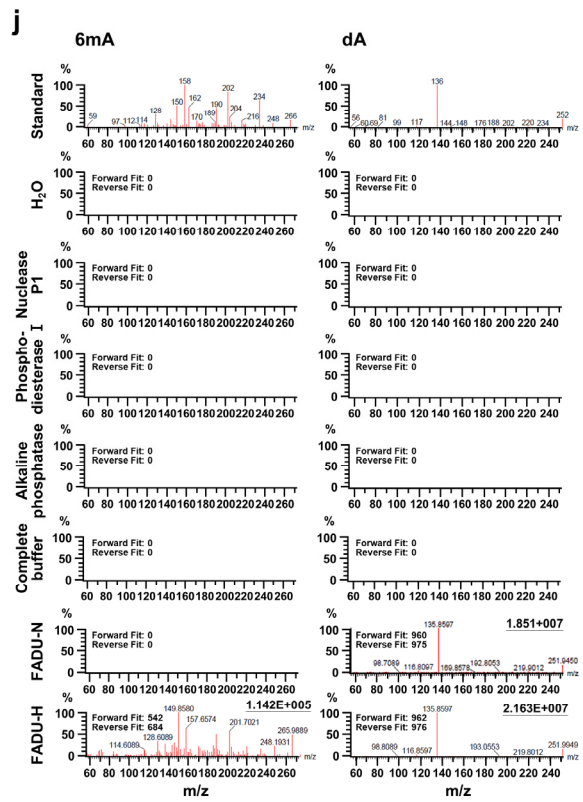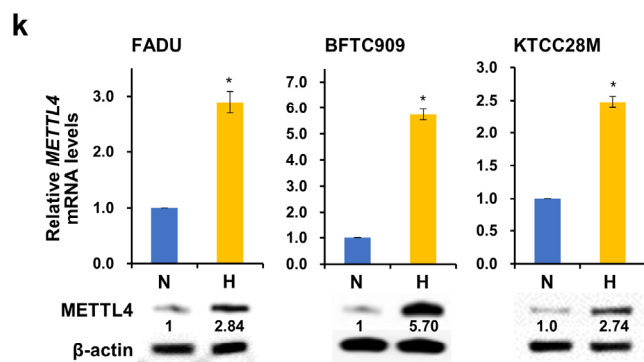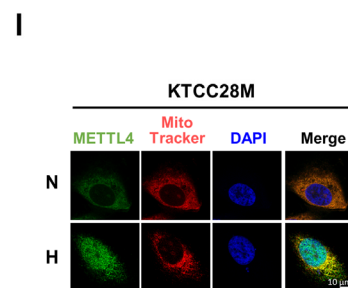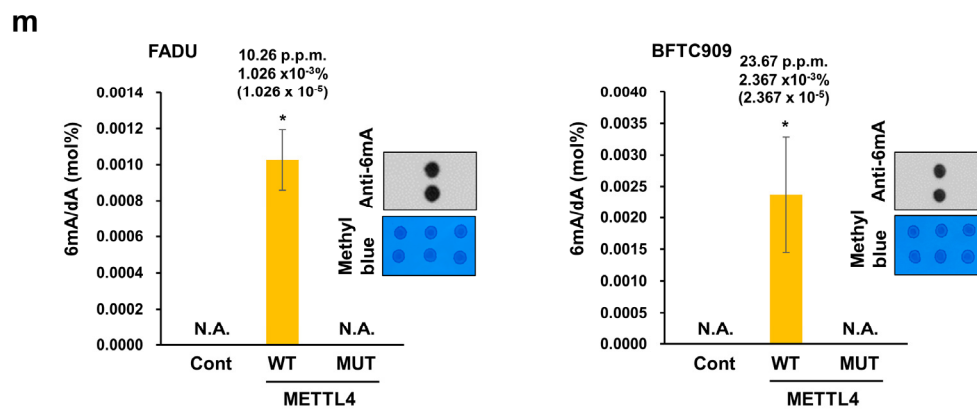



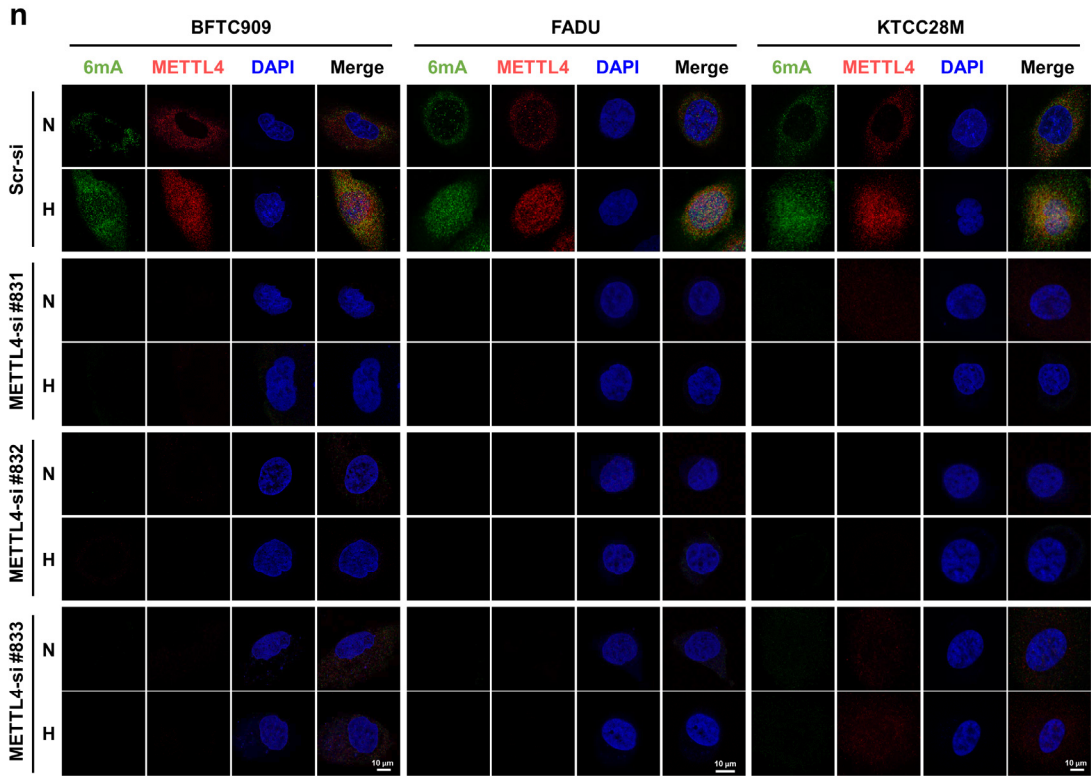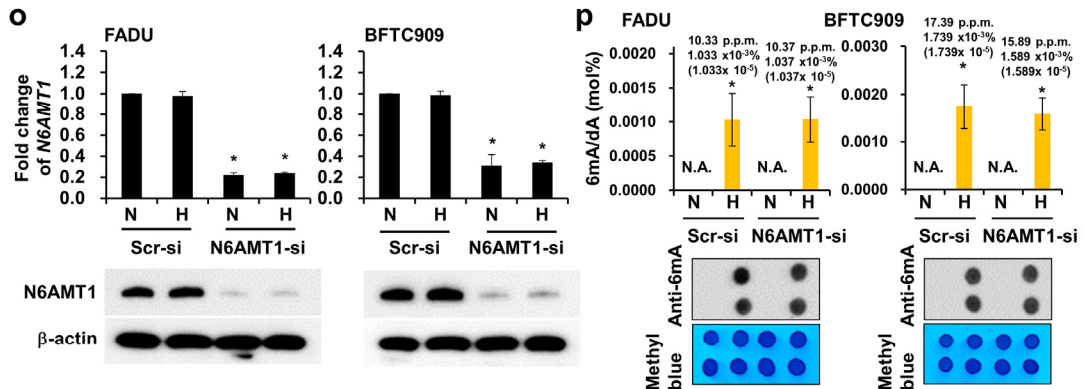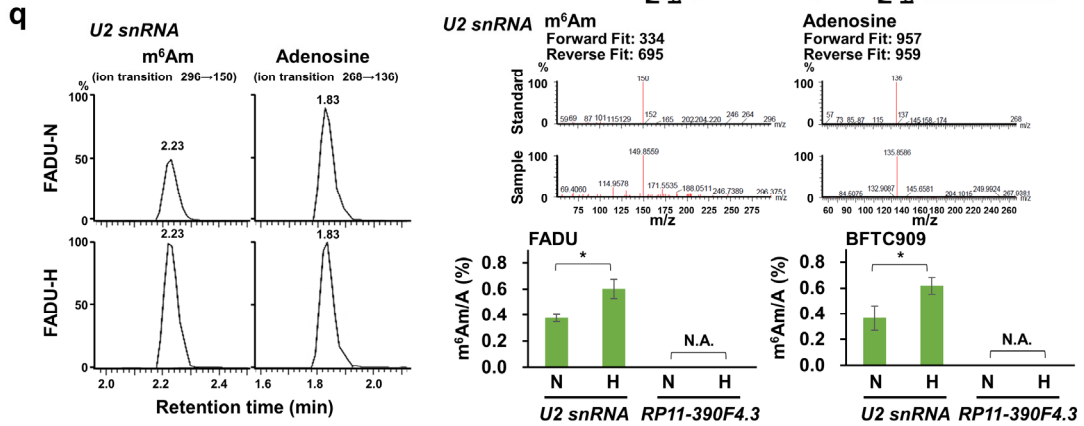

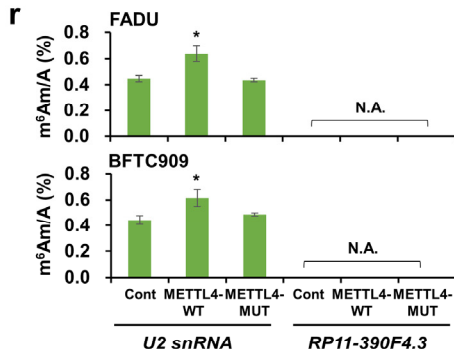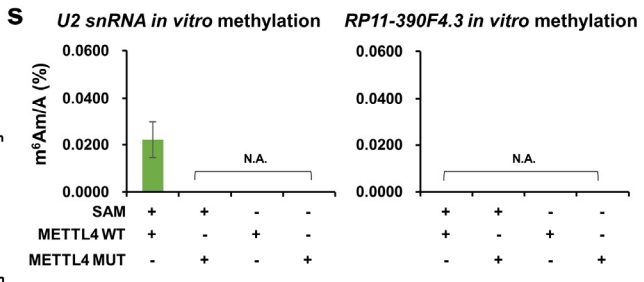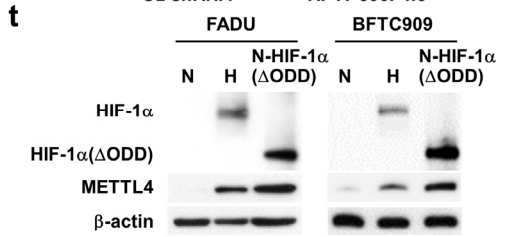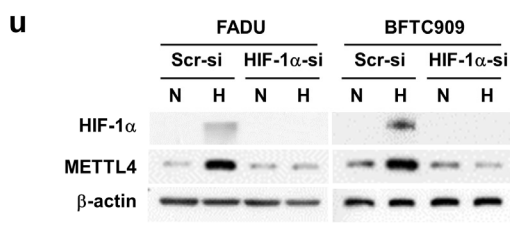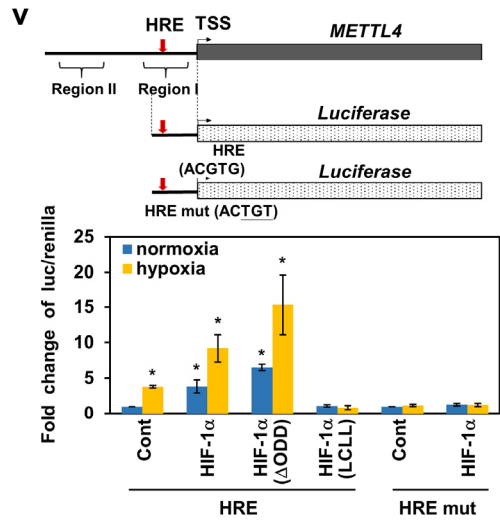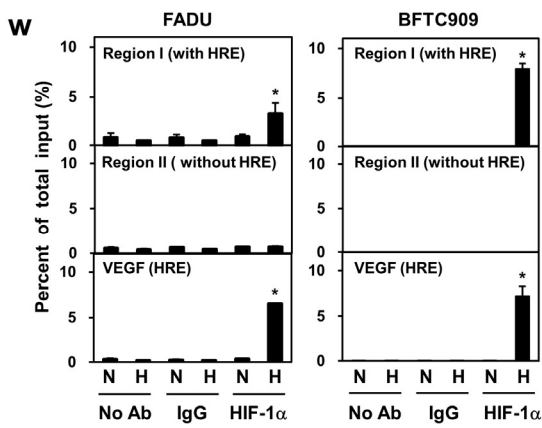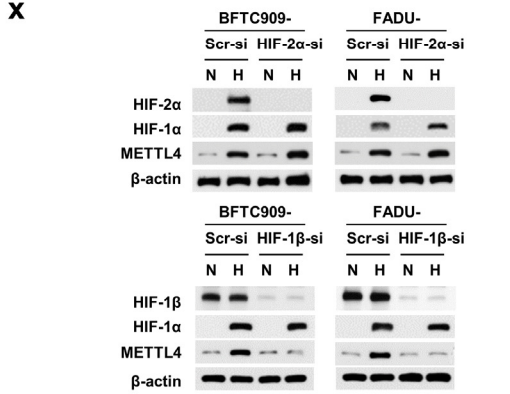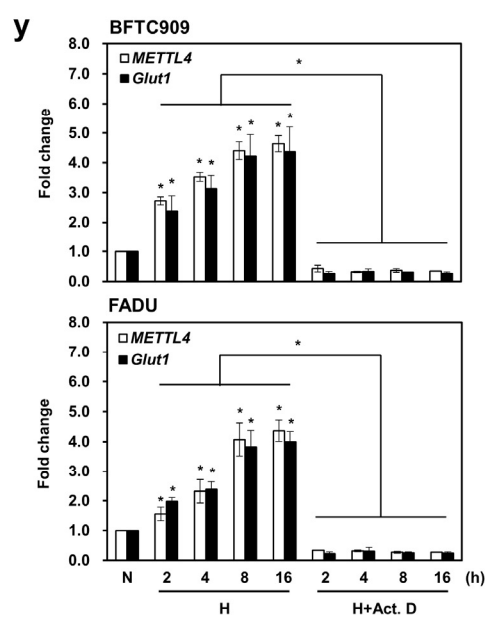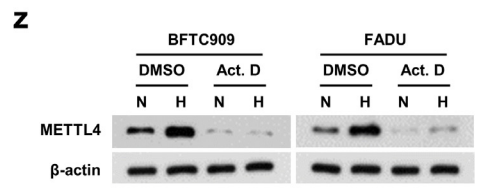

**Figure S1. Induction of 6mA levels and activation of METTL4 by hypoxia/HIF-1 $\alpha$ , and other characterizations of m<sup>6</sup>Am, N6AMT1, HIF-2 $\alpha$ , and HIF-1 $\beta$  and Actinomycin experiments.**

(a) The relative LC peaks of 6mA and dA in the representative sample were verified by 6mA and dA standards with each MRM transition. The amount of 6mA and dA were determined by UPLC-EIS-MS/MS analysis as a representative chromatogram and quantified by their integrated area in the corresponding chromatogram. Peaks for sample (gDNA digested by FADU cells under hypoxia) and 6mA/dA standard were shown, respectively.

(b) The calibration curves were generated by commercial 6mA and dA standards.

(c) Among the various stress conditions, only hypoxia induced detectable nuclear 6mA levels in FADU and BFTC909 cells by UPLC-ESI-MS/MS analysis (upper panel). The 6mA/dA ratio of each sample was calculated with quantified 6mA and dA values in accordance with the calibration curves obtained from dA and 6mA standards. RNA and protein expression levels of METTL4 after treatment with various stress conditions were shown in the bottom. The asterisk (\*) indicated statistical significance ( $P < 0.05$ ) between experimental and control group. The non-treated condition was used as a control. Corresponding 6mA dot blots with methyl blue loading controls were shown together with bar graphs.

(d) Hypoxia increased the nuclear 6mA levels of KTCC28M. The 6mA/dA ratios of KTCC28M gDNAs were evaluated from the results of UPLC-ESI-MS/MS quantification. The asterisk (\*) indicated statistical significance ( $P < 0.05$ ) between experimental and control conditions. N, normoxia; H, hypoxia. Normoxic condition was used as a control. Corresponding 6mA dot blots with methyl blue loading controls were shown together with bar graphs.

(e) The efficiency of removing mitochondrial DNA from the genomic DNA extraction step was quantified by quantitative real-time PCR analysis using mitochondrial and nuclear specific primers in FADU, BFTC909, and KTCC28M cell lines. The quality of the extraction was assessed by comparing the fold change of mitochondrial DNA versus genomic DNA using the  $\Delta C_t$  method.

(f) No 6mA levels were detectable in all the reagents by UPLC-ESI-MS/MS analysis. N, normoxia; H, hypoxia. Normoxic condition was used as a control. The asterisk (\*) indicated statistical significance ( $P < 0.05$ ) between experimental and control conditions. Corresponding 6mA dot blots with methyl blue loading controls were shown together with bar graphs.

(g) Immunofluorescence staining showed the consistently increased nuclear and cytoplasmic staining of 6mA in FADU, BFTC909, and KTCC28M cells under hypoxia with or without antigen retrieval procedure. Cell nuclei were stained by DAPI.

Mitochondria were stained by MitoTracker. Bar graph represented the percentage of cells containing nuclear or cytoplasmic 6mA signals. N, normoxia; H, hypoxia. Normoxic condition was used as a control. The asterisk (\*) indicated statistical significance ( $P<0.05$ ) between experimental and control conditions. N.S., not statistically significant.

**(h)** Immunofluorescence staining showed the increased nuclear staining of 6mA in BFTC909 and KTCC28M cells under hypoxia. 6mA signals still remained under RNase treatment, but mostly disappeared under DNase or RNase+DNase treatment, indicating the specific nuclear 6mA signals. Cell nuclei were stained by DAPI. Mitochondria were stained by MitoTracker. N, normoxia; H, hypoxia. Normoxic condition was used as a control.

**(i)** Bar graph represented the percentage of cells containing nuclear or cytoplasmic 6mA signals. N, normoxia; H, hypoxia. Normoxic condition was used as a control. The asterisk (\*) indicated statistical significance ( $P<0.05$ ) between experimental and control conditions.

**(j)** MS/MS fragmentation profiling confirmed that no 6mA levels were detected in all the reagents tested. Detected 6mA and dA in gDNAs were verified by product ion conformation spectra (PICS) fit to the spectrum generated from each standard. Parental ion of 6mA was  $m/z$  266 with major daughter ion  $m/z$  150. Parental ion of dA was  $m/z$  252 with major daughter ion  $m/z$  136.

**(k)** Hypoxia increased METTL4 levels (mRNAs and proteins) in FADU, BFTC909, and KTCC28M cell lines. The quantification of METTL4 protein levels induced by hypoxia are listed below the lane.  $\beta$ -actin was used as a loading control. The asterisk (\*) indicated statistical significance ( $P<0.05$ ) between experimental and control conditions. N, normoxia; H, hypoxia. Normoxic condition was used as a control.

**(l)** Immunofluorescence staining showed the increased nuclear METTL4 levels under hypoxia in KTCC28M cells. Cell nuclei were stained by DAPI. Mitochondria were stained by MitoTracker. N, normoxia; H, hypoxia. Normoxic condition was used as a control.

**(m)** Overexpression of METTL4, but not the enzymatically inactive mutant, increased the 6mA levels in FADU and BFTC909 cell lines by UPLC-ESI-MS/MS analysis. The cell clone transfected with the control vector was used as a control. The asterisk (\*) indicated statistical significance ( $P<0.05$ ) between experimental and control groups. Corresponding 6mA dot blots with methyl blue loading controls were shown together with bar graphs.

**(n)** Immunofluorescence staining showed the staining of METTL4 under hypoxia and abolishment of METTL4 staining under *METTL4* knockdown in BFTC909, FADU, and KTCC28M cell lines. Three different siRNAs were used to knockdown *METTL4*.

Knockdown using the scrambled siRNA under normoxia condition was used as a control. Cell nuclei were stained by DAPI. N, normoxia; H, hypoxia.

**(o)** Knockdown of *N6AMT1* decreased the *N6AMT1* mRNA and protein levels in FADU and BFTC909 cells by qRT-PCR and Western blot analysis. N, normoxia; H, hypoxia. Knockdown using the scrambled siRNA under normoxia condition was used as a control. The asterisk (\*) indicated statistical significance ( $P<0.05$ ) between experimental and control groups.

**(p)** Knockdown of *N6AMT1* showed that the induction of 6mA by hypoxia still maintained in the presence of *N6AMT1* knockdown using UPLC-ESI-MS/MS analysis in FADU and BFTC909 cells. N, normoxia; H, hypoxia. Knockdown using the scrambled siRNA under normoxia condition was used as a control. The asterisk (\*) indicated statistical significance ( $P<0.05$ ) between experimental and control groups. Corresponding 6mA dot blots with methyl blue loading controls were shown together with bar graphs.

**(q)** Hypoxia increased the *U2 snRNA* m<sup>6</sup>Am levels of FADU and BFTC909 cells. The quantity of m<sup>6</sup>Am and Adenosine of digested *U2 snRNAs* of FADU cells was determined by UPLC-ESI-MS/MS analysis as the representative chromatograms. The nucleosides of digested *U2 snRNAs* were identified using LC retention with MS/MS spectra and quantified based on the ion mass transitions; m<sup>6</sup>Am (m/z): 296 to 150 and adenosine (m/z): 268 to 136 in MRM mode. Peaks for normoxia and hypoxia samples of FADU cells were shown. Detected m<sup>6</sup>Am and A in *U2 snRNAs* were verified by product ion conformation spectra (PICS) fit to the spectrum generated from each standard. Parental ion of m<sup>6</sup>Am was m/z 296 with major daughter ion m/z 150. Parental ion of A was m/z 268 with major daughter ion m/z 136. The m<sup>6</sup>Am/A ratios of FADU and BFTC909 RNAs (*U2 snRNA* or *RP11-390F4.3*) were evaluated from the results of UPLC-ESI-MS/MS quantification. N, normoxia; H, hypoxia. Normoxic condition was used as a control. The asterisk (\*) indicated statistical significance ( $P<0.05$ ) between experimental and control condition.

**(r)** The amount of m<sup>6</sup>Am and adenosine of *U2 snRNA* and *RP11-390F4.3* digested by FADU and BFTC909 cells were determined by UPLC-ESI-MS/MS analysis. Results showed that mutation of the enzymatic site of METTL4 abolished the *U2 snRNA* m<sup>6</sup>Am modifying activity in FADU and BFTC909 cells. The cell clone transfected with the control vector was used as a control. The asterisk (\*) indicated statistical significance ( $P<0.05$ ) between experimental and control groups.

**(s)** *In vitro* RNA methylation assays showed mutation of the enzymatic site of METTL4 abolished the *U2 snRNA* m<sup>6</sup>Am levels.

**(t)** Hypoxia and overexpression of a constitutively active HIF-1 $\alpha$ ( $\Delta$ ODD) under normoxia activated METTL4 expression. N, normoxia; H, hypoxia.

**(u)** Knockdown of *HIF-1 $\alpha$*  abolished the activation of METTL4 induced by hypoxia by Western blot analysis. N, normoxia; H, hypoxia. Knockdown using the scrambled siRNA was used as a control.

**(v)** Reporter gene assays showed the identification of HRE (hypoxia response element) in the proximal promoter of *METTL4* and hypoxia/HIF-1 $\alpha$  activated the *METTL4* promoter activity. The asterisk (\*) indicated statistical significance ( $P<0.05$ ) between experimental and control groups. The luciferase/renilla activities of FADU cells co-transfected with reporter construct and pcDNA3 control vector under normoxia were used as the baseline control.

**(w)** Chromatin immunoprecipitation (ChIP) assays showed the direct binding of HIF-1 $\alpha$  to the HRE located in *METTL4* promoter under hypoxia in FADU and BFTC909 cells. N, normoxia; H, hypoxia. No antibody/normoxia condition was used as a control. The binding of HIF-1 $\alpha$  to the *VEGF* promoter was used as a positive control. The asterisk (\*) indicated statistical significance ( $P<0.05$ ) between experimental and control groups.

**(x)** Knockdown of *HIF-2 $\alpha$*  did not abolish the activation of METTL4 induced by hypoxia by Western blot analysis. Knockdown of *HIF-1 $\beta$*  abolished the activation of METTL4 induced by hypoxia by Western blot analysis. N, normoxia; H, hypoxia. Knockdown using the scrambled siRNA was used as a control.

**(y-z)** Actinomycin D treatment significantly decreased the activation of METTL4 (at the mRNA and protein levels) under hypoxia. N, normoxia; H, hypoxia. Treatment with dimethyl sulfoxide (DMSO) under normoxic condition was used as a control. The asterisk (\*) indicated statistical significance ( $P<0.05$ ) between experimental and control groups. Actinomycin D (Act. D; 2  $\mu\text{g/ml}$ ) in DMSO was used to study transcriptional regulation.

The error bars represented the standard deviation (SD). Student's *t*-test was used to compare two groups of independent samples. For details, see method section.



**Figure S2**

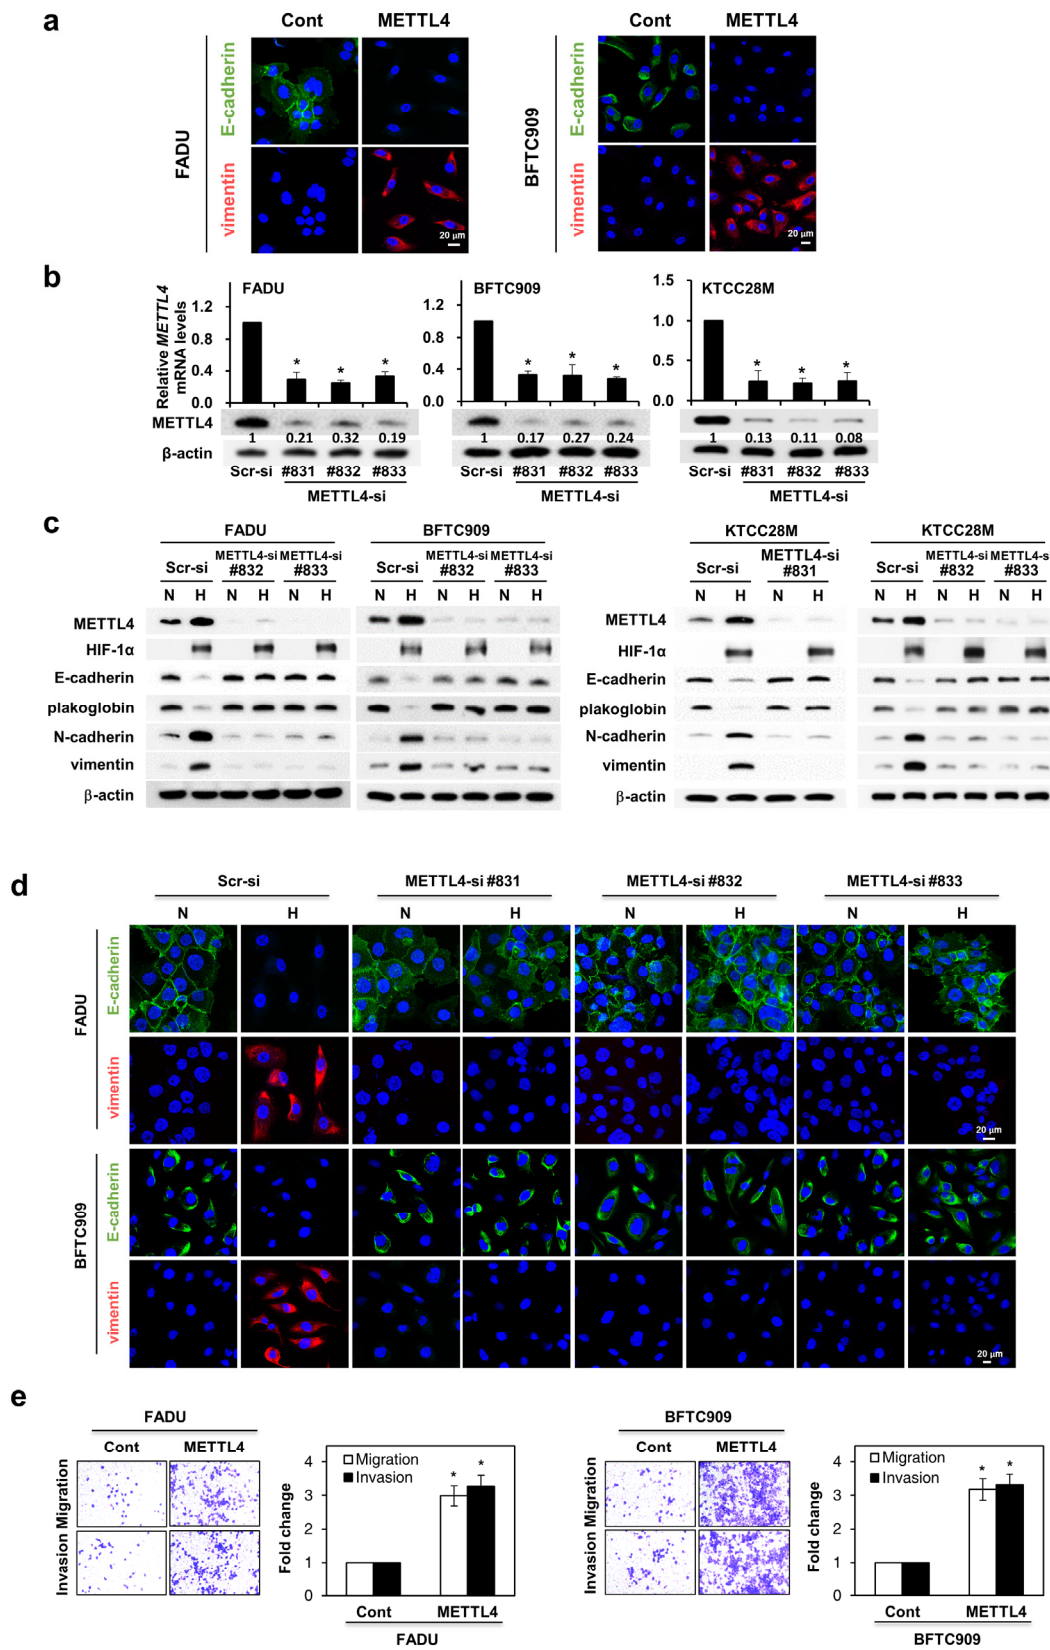

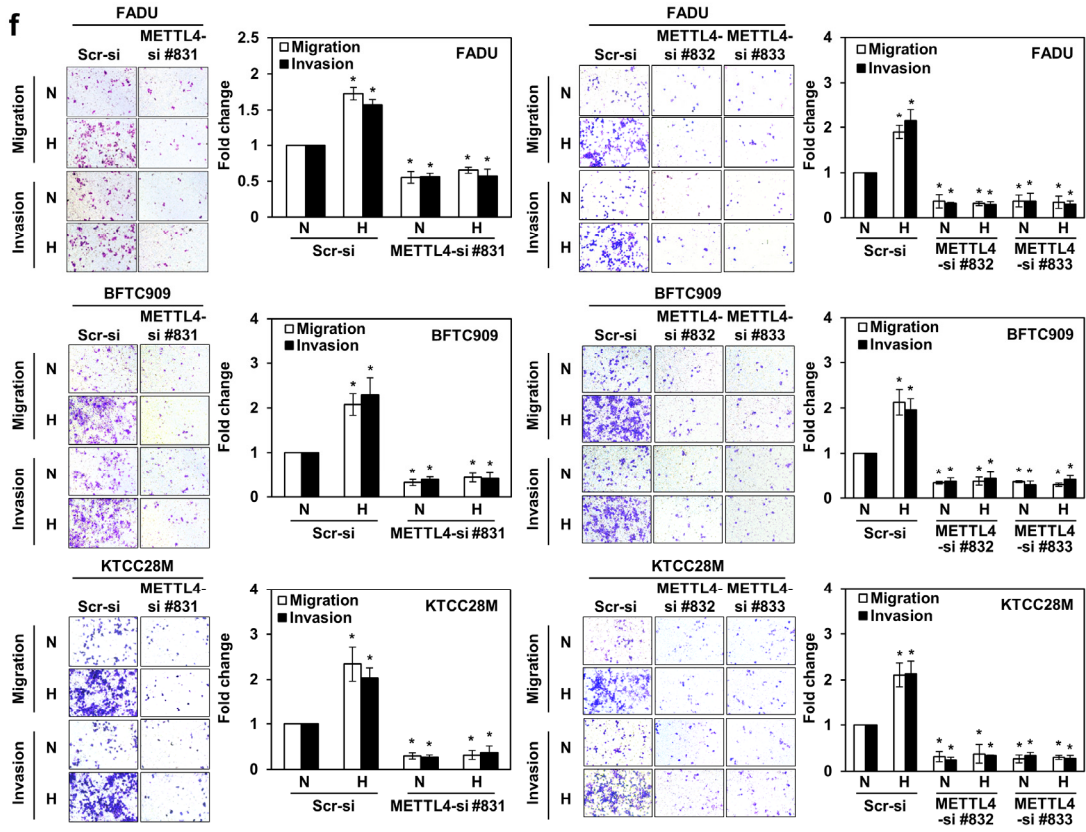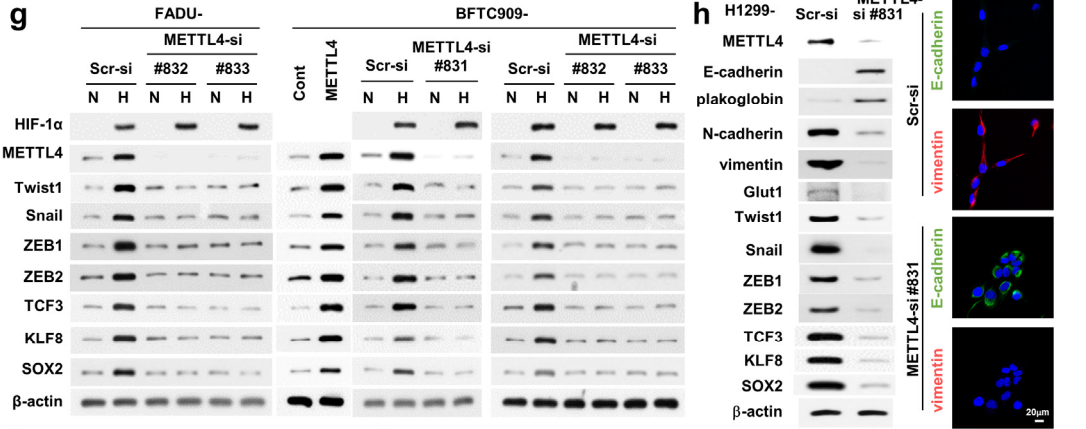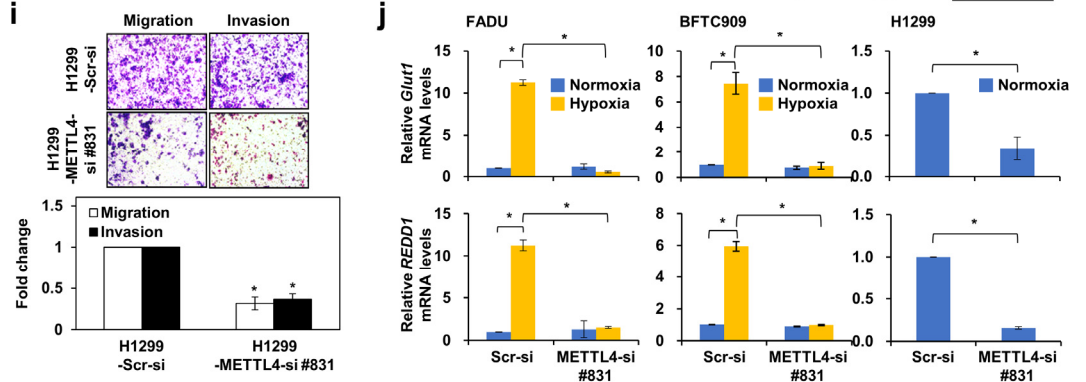

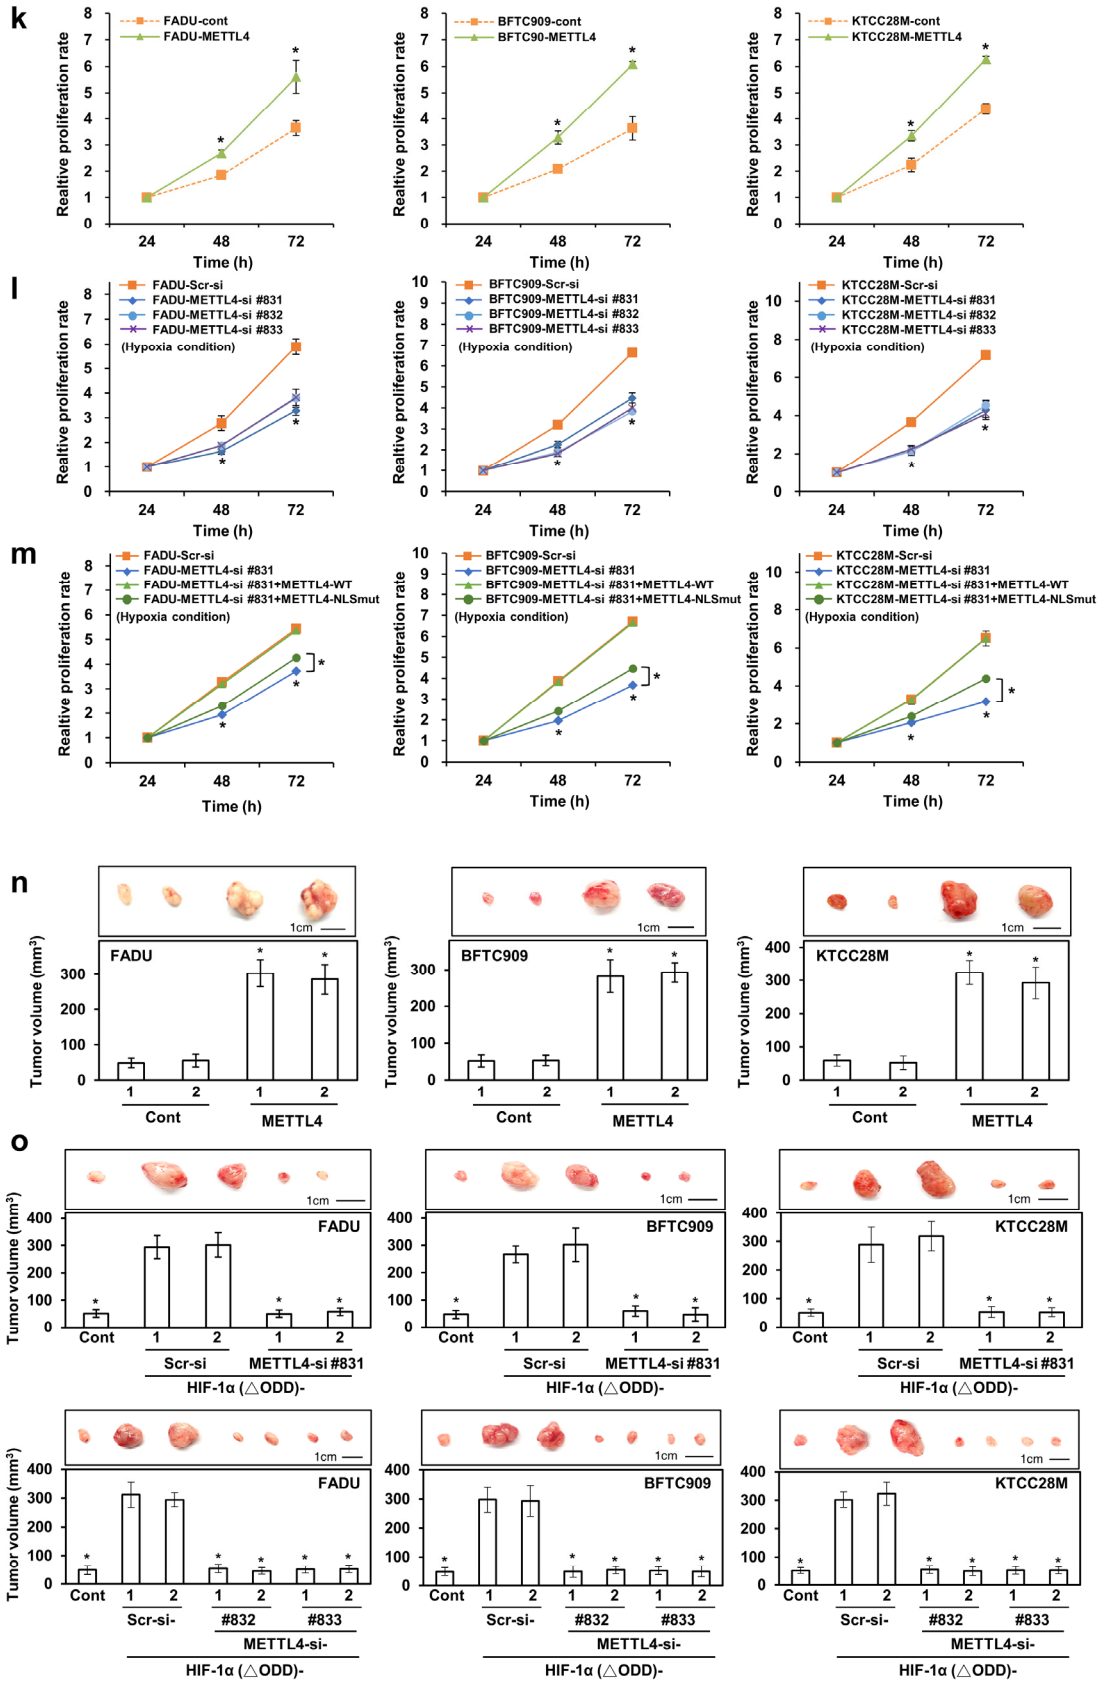

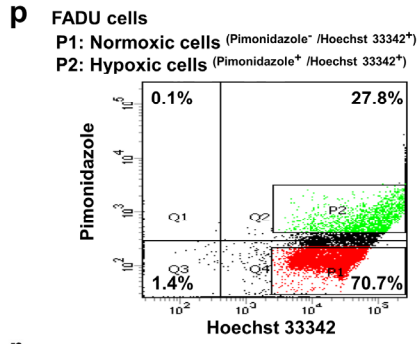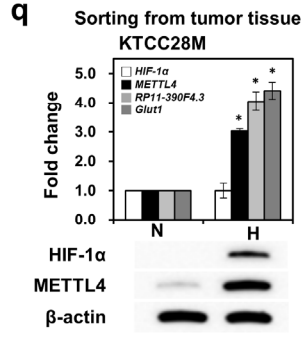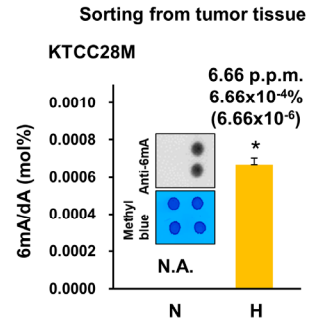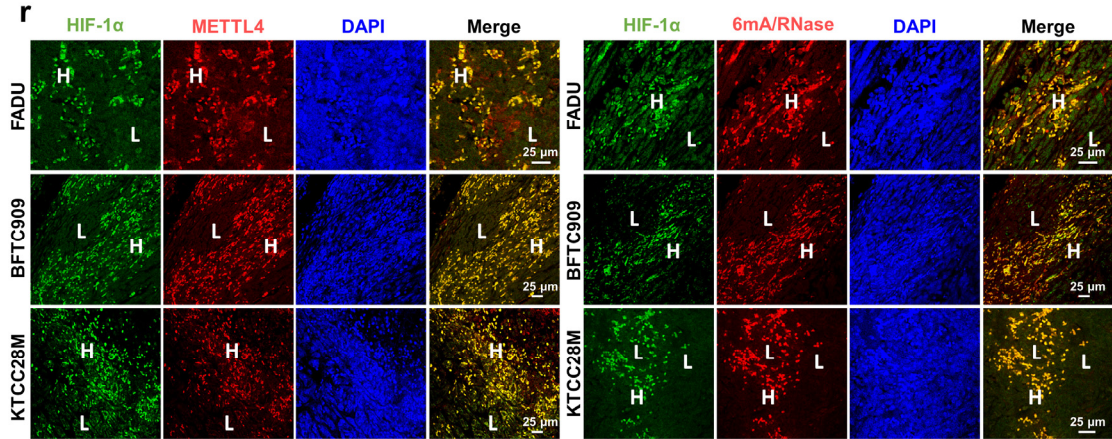

**Figure S2. The critical role of METTL4 in inducing EMT and metastasis, induction of tumorigenicity and *in vitro* migration/invasion activity by METTL4, the critical role of METTL4 in EMT and *in vitro* migration/invasion activity in two other cell lines, the set of EMT regulators activated by hypoxia, analysis of xenografted tumor samples after sorting by real-time PCR analysis and UPLC-ESI-MS/MS measurement of 6mA levels, the essential role of enzymatic activity of METTL4 in hypoxia-induced EMT, and increased expression of METTL4, 6mA and HIF-1 $\alpha$  in the tumor samples of UTUC patients.**

**(a)** Overexpression of METTL4 induced EMT by immunofluorescence staining of E-cadherin and vimentin. Green, E-cadherin; red, vimentin. Cell nuclei were stained by DAPI. The cell clone transfected with the control vector was used as a control.

**(b)** Knockdown of *METTL4* decreased the METTL4 mRNA and protein levels in FADU, BFTC909, and KTCC28M cells by qRT-PCR and Western blot analysis. Three different siRNAs were used to knockdown *METTL4*. The quantification of METTL4 protein levels after *METTL4* knockdown are listed below the lane.  $\beta$ -actin was used as a loading control. Knockdown using the scrambled siRNA was used as a control. The asterisk (\*) indicated statistical significance ( $P < 0.05$ ) between experimental and control groups.

**(c-d)** Western blot analysis and immunofluorescence staining showed that knockdown of *METTL4* abolished the hypoxia-induced EMT in different cell lines. Three different siRNAs were used to knockdown *METTL4*. Knockdown using the scrambled siRNA was used as a control. N, normoxia; H, hypoxia. Cell nuclei were stained by DAPI. Green, E-cadherin; red, vimentin.

**(e)** METTL4 overexpression induced the *in vitro* migration and invasion activity of two different cell lines. Representative photos of the *in vitro* migration and invasion activity were shown in this panel. The cell clone transfected with the control vector was used as a control. The asterisk (\*) indicated statistical significance ( $P < 0.05$ ) between experimental and control groups.

**(f)** Knockdown of *METTL4* significantly decreased the *in vitro* migration and invasion activity of three different cell lines. Representative photos of the *in vitro* migration and invasion activity were shown in this panel. Three different siRNAs were used to knockdown *METTL4*. Knockdown using the scrambled siRNA under normoxic condition was used as a control. The asterisk (\*) indicated statistical significance ( $P < 0.05$ ) between experimental and control conditions. N, normoxia; H, hypoxia.

**(g)** METTL4 overexpression activated the expression of EMT regulator genes in BFTC909 cells and *METTL4* knockdown abolished the activation of EMT regulator gene expression induced by hypoxia in FADU and BFTC909 cells by Western blot analysis. Three different siRNAs were used to knockdown *METTL4*. Knockdown using



the scrambled siRNA was used as a control. N, normoxia; H, hypoxia.

**(h)** Knockdown of *METTL4* reversed the mesenchymal phenotypes of H1299 cells by Western blot and immunofluorescence staining experiments. Knockdown using the scrambled siRNA was used as a control. Cell nuclei were stained by DAPI. Green, E-cadherin; red, vimentin.

**(i)** Knockdown of *METTL4* significantly decreased the *in vitro* migration and invasion activity of H1299 cells. Representative photos of the *in vitro* migration and invasion activity were shown on the top. Knockdown using the scrambled siRNA was used as a control. The asterisk (\*) indicated statistical significance ( $P<0.05$ ) between experimental and control groups.

**(j)** Knockdown of *METTL4* decreased the RNA levels of *Glut1* and *REDD1* genes in three different cell lines. The measurement was assayed under normoxia vs. hypoxia in the FADU and BFTC909 cells (epithelial phenotype cells) and under normoxic condition in H1299 cells (mesenchymal phenotype cells). Measurement of *Glut1* (upper panel) and *REDD1* (lower panel) gene expression by real-time PCR analysis was performed. Knockdown using the scrambled siRNA under normoxic condition was used as a control for all cell lines. The asterisk (\*) indicated statistical significance ( $P<0.05$ ) between experimental and control groups.

**(k)** Overexpression of *METTL4* increased the cell proliferation rates of FADU, BFTC909, and KTCC28M cells. The cell clone transfected with the control vector was used as a control. The asterisk (\*) indicated statistical significance ( $P<0.05$ ) between experimental and control groups.

**(l)** Knockdown of *METTL4* significantly decreased the cell proliferation rates of three different cell lines under hypoxia. Knockdown using the scrambled siRNA under hypoxia condition was used as a control. The asterisk (\*) indicated statistical significance ( $P<0.05$ ) between experimental and control groups.

**(m)** *METTL4* knockdown followed by rescue experiments showed that the *METTL4*-NLSmut only partially rescued the cell proliferation rates that were decreased by *METTL4* knockdown under hypoxia compared with the full rescue by *METTL4* wild type in FADU, BFTC909, and KTCC28M cells. Knockdown using the scrambled siRNA under hypoxia condition was used as a control. The asterisk (\*) indicated statistical significance ( $P<0.05$ ) between experimental and control groups.

**(n)** Overexpression of *METTL4* increased the tumor volume of FADU, BFTC909, and KTCC28M cells using xenograft implantation assays. The cell clone transfected with the control vector was used as a control. The asterisk (\*) indicated statistical significance ( $P<0.05$ ) between experimental and control groups.

**(o)** HIF-1 $\alpha$ -overexpression induced tumor volume increase in three different cell lines, and the HIF-1 $\alpha$ -induced increase in tumor volume was abolished by knockdown of



*METTL4* using three different siRNA vectors. Knockdown using the scrambled siRNA in overexpressing a constitutively active HIF-1 $\alpha$ ( $\Delta$ ODD) cells were used as a control. The asterisk (\*) indicated statistical significance ( $P < 0.05$ ) between experimental and control groups.

**(p)** Hypoxic tumor cells sorted from xenografted tumors from FADU cells were shown by FACSCalibur instrument. Two-color staining with pimonidazole and Hoechst 33342 as the representative chromatograms. The hypoxic cell population was defined as Hoechst 33342<sup>+</sup> and pimonidazole<sup>+</sup> cells (Area P2), and the normoxic cell population was defined as Hoechst 33342<sup>+</sup> and pimonidazole<sup>-</sup> cells (Area P1).

**(q)** Hypoxic tumor cells sorted from xenografted tumors from KTCC28M cells showed the increased HIF-1 $\alpha$  and *METTL4* protein levels together with increased HIF-1 $\alpha$  target gene expression (*METTL4*, *RP11-390F4.3*, and *Glut1* expression were measured; left panel). Hypoxic tumor cells sorted from xenografted tumors from KTCC28M cells showed an increase in the 6mA levels by UPLC-ESI-MS/MS measurement. *Glut1* activation was used as a positive control. N, normoxia; H, hypoxia. Normoxic condition was used as a control. The asterisk (\*) indicated statistical significance ( $P < 0.05$ ) between experimental and control groups. Corresponding 6mA dot blots with methyl blue loading controls were shown together with bar graphs.

**(r)** Immunofluorescence staining showed the co-localization of HIF-1 $\alpha$ , *METTL4*, and 6mA in three different cell lines cells. Green fluorescence represented staining of HIF-1 $\alpha$ ; red fluorescence represented staining of *METTL4* or 6mA. Cell nuclei were stained by DAPI. H, highly colocalized area; L, less colocalized area. Notably, HIF-1 $\alpha$  signal was highly colocalized with *METTL4* or 6mA signal.

The error bars represented the standard deviation (SD). Student's *t*-test was used to compare two groups of independent samples. For details, see method section.

**Figure S3**

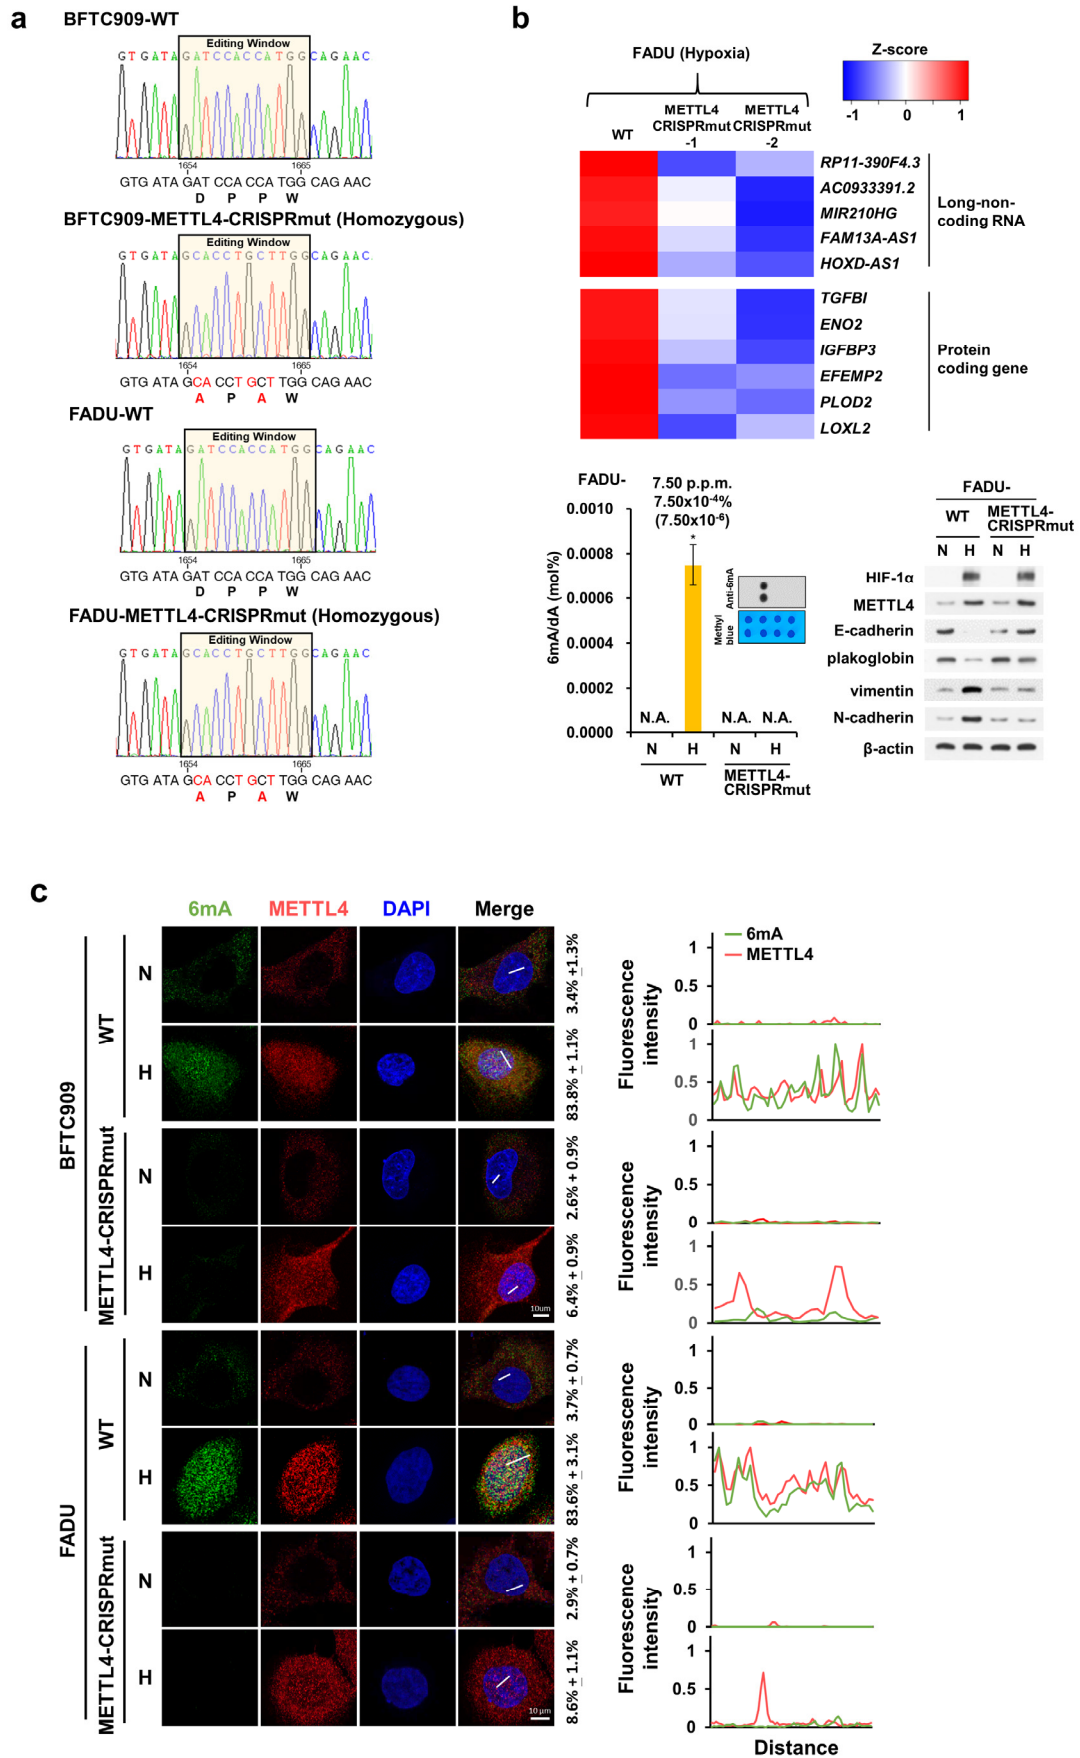

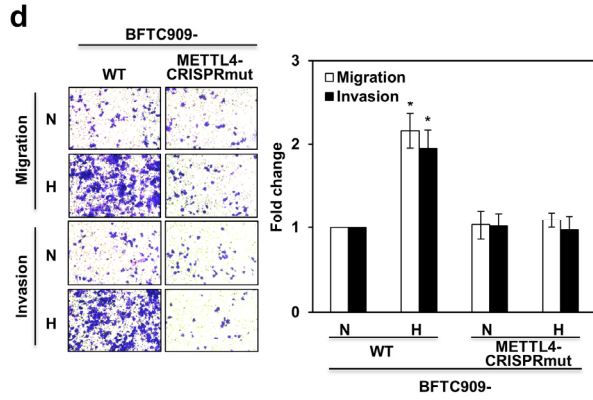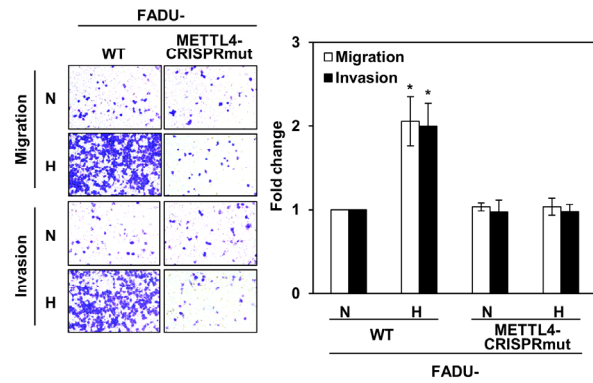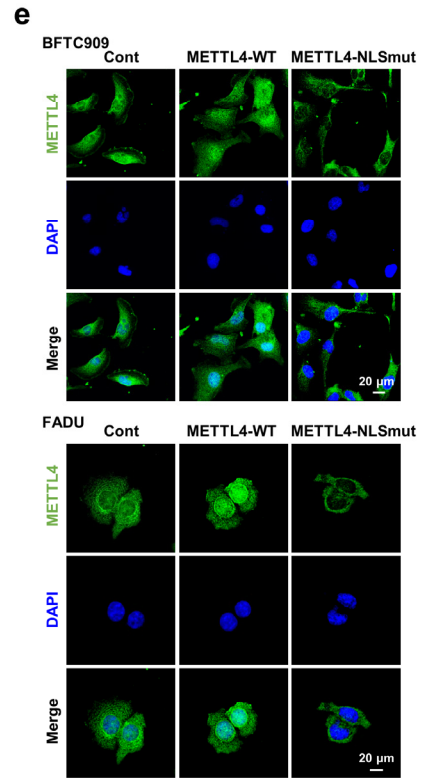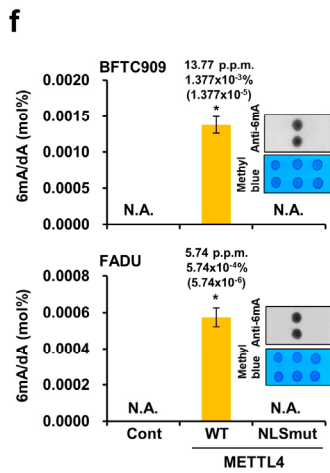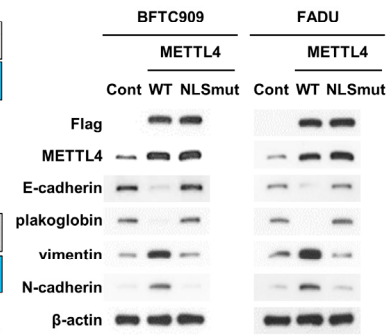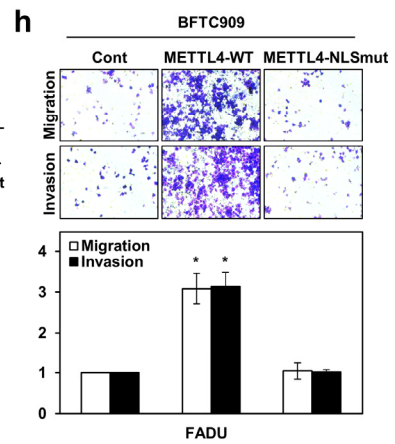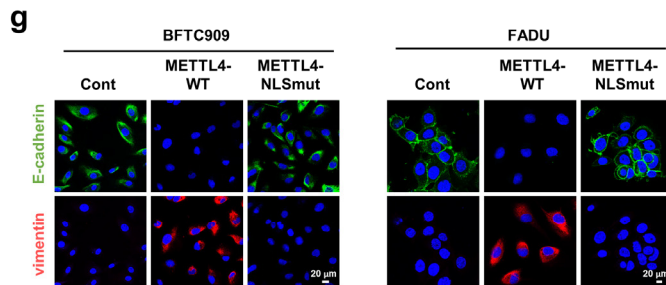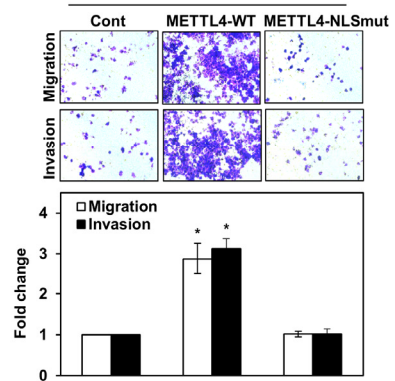

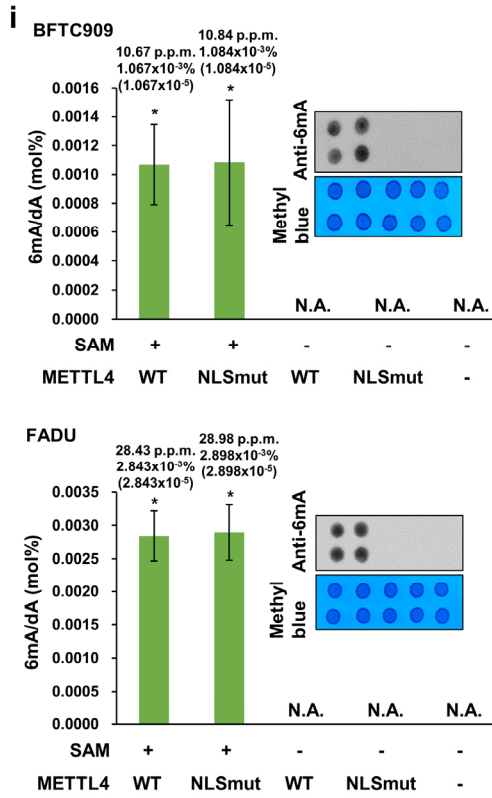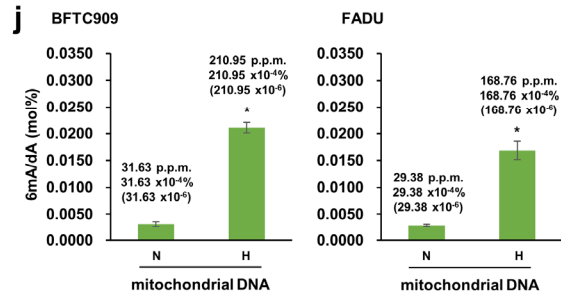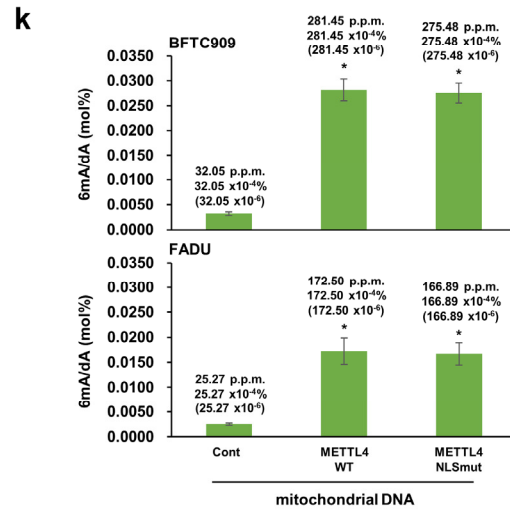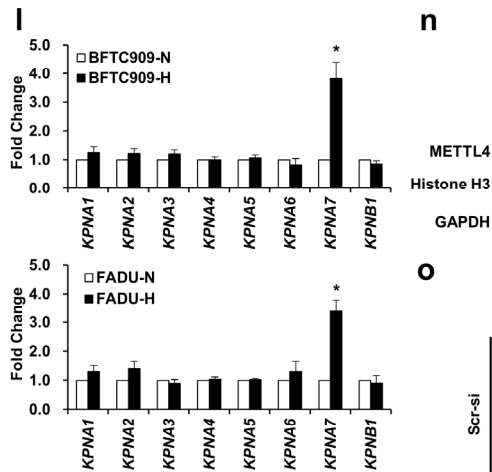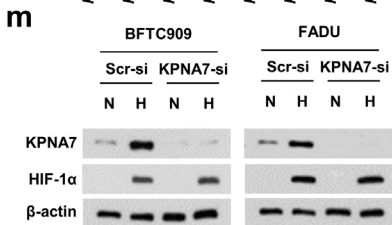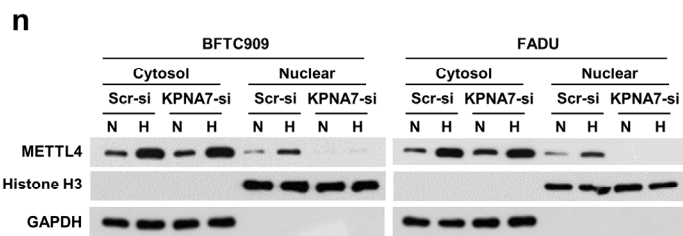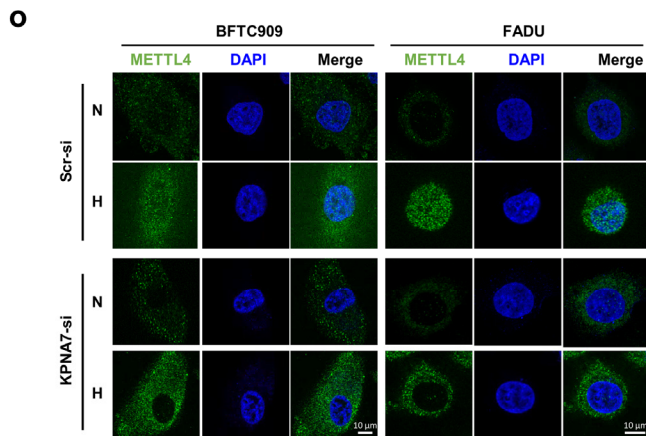

**Figure S3. Testing of the enzymatic activity of METTL4 in its ability to induce gene expression and induction of EMT phenotypes, examination of various activities of nuclear localization mutant of METTL4, and identification of KPNA7 as a nuclear transporter of METTL4.**

(a) Sequencing results showed the prime-editing CRISPR-Cas9 approach to mutate the enzymatic site (DPPW changed to APAW) of endogenous METTL4 in BFTC909 and FADU cells. The METTL4 wild-type cells were used as controls.

(b) Mutation of the enzymatic site of endogenous METTL4 by a prime-cutting CRISPR-Cas9 approach in FADU cells abolished the induction of hypoxia-regulated gene expression, 6mA levels, and EMT phenotypes by RNA-seq, UPLC-ESI-MS/MS, and Western blot analysis. Corresponding 6mA dot blots with methyl blue loading controls were shown together with bar graphs. N, normoxia; H, hypoxia. The normoxic condition for METTL4 wild-type cells was used as a control. The asterisk (\*) indicated statistical significance ( $P < 0.05$ ) between experimental and control groups.

(c) Immunofluorescence staining showed the co-localizations of 6mA and METTL4 induced by hypoxia in BFTC909 and FADU cells. The cells with endogenous mutation of METTL4 enzymatic site did not mediate 6mA deposition and no co-localizations of 6mA and METTL4 could be shown. Cell nuclei were stained by DAPI. Lines indicate the plot profiles shown to the right. Lines were only placed inside nucleus. The percentage and fluorescence intensity of 6mA and METTL4 co-localized signals in the nucleus were shown next to the immunofluorescence images.

(d) Mutation of the enzymatic site of endogenous METTL4 by a prime-cutting CRISPR-Cas9 approach in FADU and BFTC909 cells abolished the induction of the *in vitro* migration and invasion activity by hypoxia. Representative photos of the *in vitro* migration and invasion activity were shown in the panel.

(e) Immunofluorescence staining showed overexpression of METTL4-NLSmut could not increase nuclear levels of METTL4 in FADU and BFTC909 cells. Cell nuclei were stained by DAPI. The cell clone transfected with the control vector was used as a control.

(f) Overexpression of METTL4, but not METTL4-NLSmut, increased 6mA levels and induced EMT phenotypes in two different cell lines. The cell clone transfected with the control vector was used as a control. The asterisk (\*) indicated statistical significance ( $P < 0.05$ ) between experimental and control groups. Corresponding 6mA dot blots with methyl blue loading controls were shown together with bar graphs.

(g) Immunofluorescence staining showed the inability of a nuclear-localization defective METTL4 mutant (METTL4-NLSmut) to induce EMT in the BFTC909 and FADU cells. Green fluorescence represented staining of E-cadherin; red fluorescence represented staining of vimentin. Cell nuclei were stained by DAPI. The cell clone transfected with the control vector was used as a control.

**(h)** Overexpression of METTL4, but not METTL4-NLSmut, induced EMT phenotypes in two different cell lines. Representative photos of the *in vitro* migration and invasion activity were shown in this panel. The cell clone transfected with the control vector was used as a control. The asterisk (\*) indicated statistical significance ( $P < 0.05$ ) between experimental and control groups.

**(i)** *In vitro* DNA methylation assays showed an increase in the 6mA levels by incubating METTL4 (wild type or NLS mutant) with genomic DNAs from FADU or BFTC909 cells. Either using the METTL4-NLSmut or not incubating with SAM did not induce any measurable 6mA levels. The asterisk (\*) indicated statistical significance ( $P < 0.05$ ) between experimental and control groups. Corresponding 6mA dot blots with methyl blue loading controls were shown together with bar graphs.

**(j-k)** Hypoxia or overexpression of either METTL4-WT or METTL4-NLSmut increased 6mA levels of mitochondrial DNA in two different cell lines by UPLC-ESI-MS/MS analysis. N, normoxia; H, hypoxia. Normoxic condition and the cell clone transfected with the control vector were used as a control. The asterisk (\*) indicated statistical significance ( $P < 0.05$ ) between experimental and control groups.

**(l)** Hypoxia induced the *KPNA7* mRNA levels by real-time PCR analysis in BFTC909 and FADU cells. N, normoxia; H, hypoxia. Normoxic condition was used as a control. The asterisk (\*) indicated statistical significance ( $P < 0.05$ ) between experimental and control groups.

**(m)** Knockdown of *KPNA7* abolished the *KPNA7* levels induced by hypoxia in BFTC909 and FADU cells by Western blot analysis. N, normoxia; H, hypoxia. Knockdown using the scrambled siRNA was used as a control.

**(n-o)** Knockdown of *KPNA7* abolished the nuclear translocation of METTL4 induced by hypoxia by nuclear fractionation (Western blot) analysis and immunofluorescence staining. N, normoxia; H, hypoxia. Knockdown using the scrambled siRNA was used as a control. Histone H3 and GAPDH was used as a nuclear and cytoplasmic marker, respectively. Cell nuclei were stained by DAPI.

The error bars represented the standard deviation (SD). Student's *t*-test was used to compare two groups of independent samples. For details, see method section.



**Figure S4**

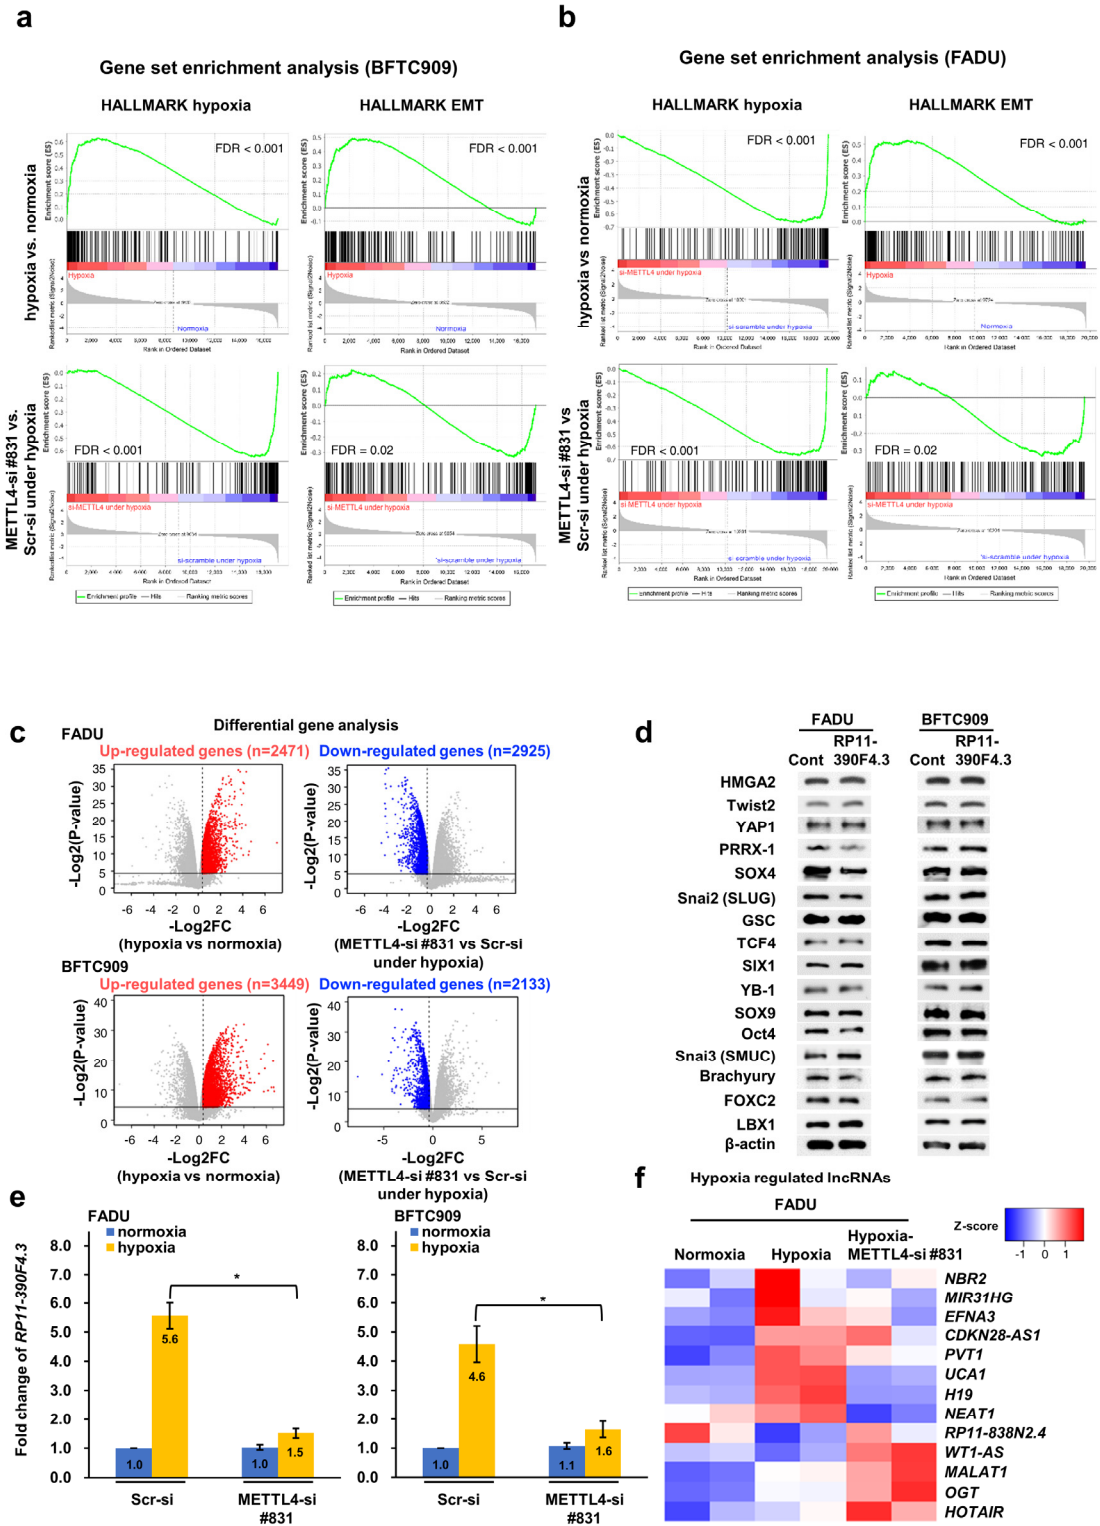

**g**

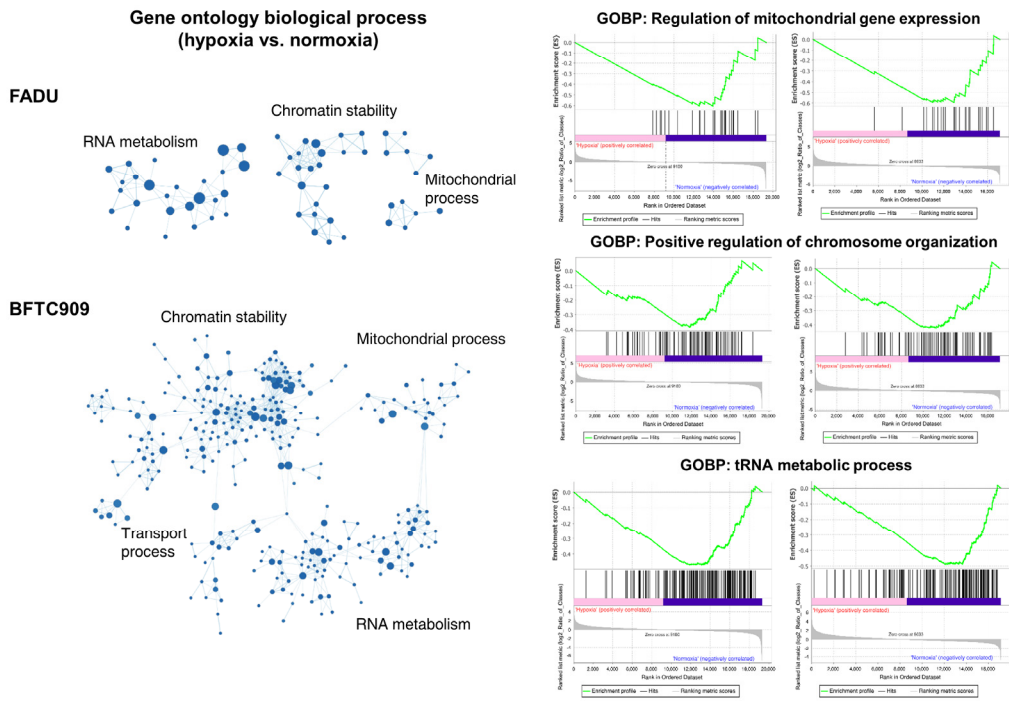

**h**

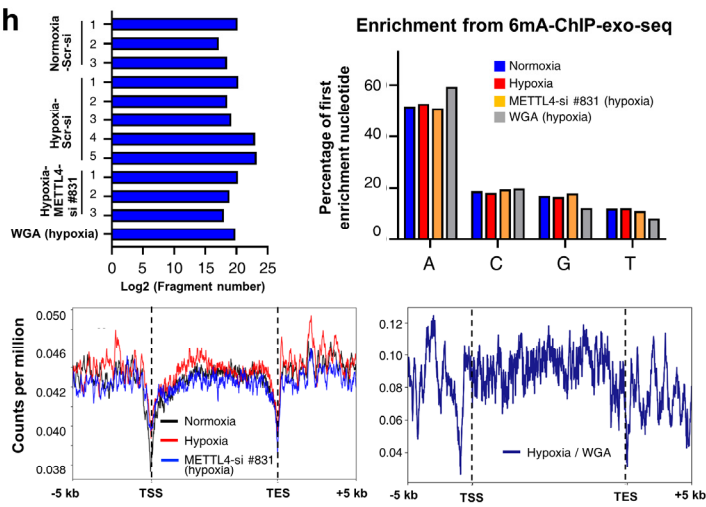

**i**

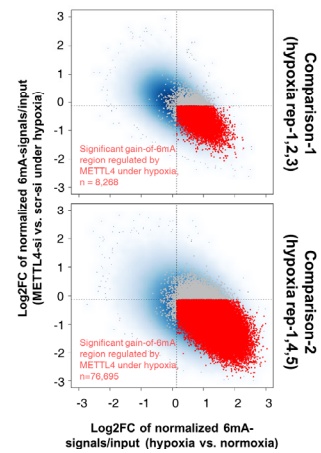

**j**

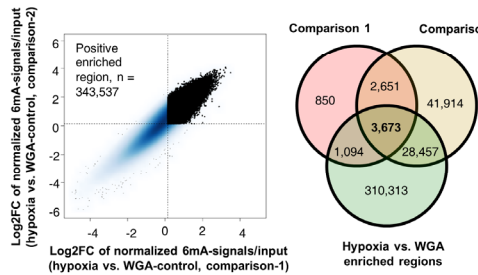

**k**

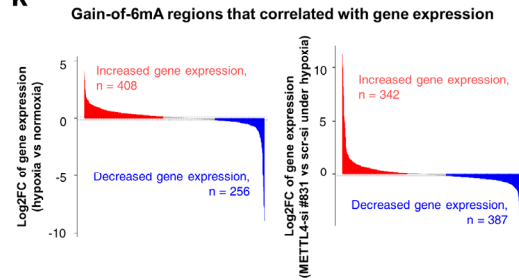

**l**  
Hypoxia gain-of-6mA genes that correlated with gene expression (Increased gene expression)

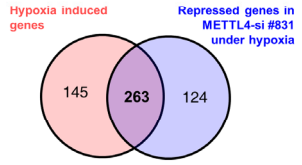

Top 10 enriched KEGG

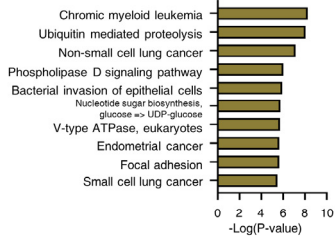

**m**  
6mA-regulated genes in relation to HIF-1 $\alpha$  assembly to genomic loci

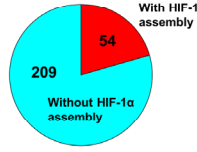

|                          |                                                                                                                                                        |
|--------------------------|--------------------------------------------------------------------------------------------------------------------------------------------------------|
| <b>Angiogenesis</b>      | <i>AKT3, DAB2IP, SLC12A6, SPINK5</i>                                                                                                                   |
| <b>Stemness</b>          | <i>CTNNA1, CDK6, RUNX2, SEMA6D, SMAD3, TP63</i>                                                                                                        |
| <b>Cancer metabolism</b> | <i>PIK3CA, CERT1, DGKH, EXOC4, EXT1, GNG12, GNPAT, HKDC1, HMGCL, HPGD, MKLN1, MME, NCOA1, PDE1C, PDGFC, PLA2R1, RAPGEF4, SOS2, SUCLG2, TPK1, VLDLR</i> |

Top 10 of enriched KEGG (with HIF-1 $\alpha$  assembly)

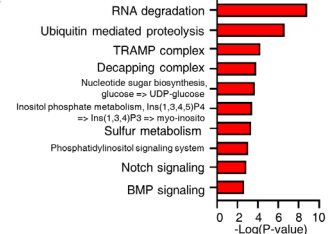

Top 10 of enriched KEGG (without HIF-1 $\alpha$  assembly)

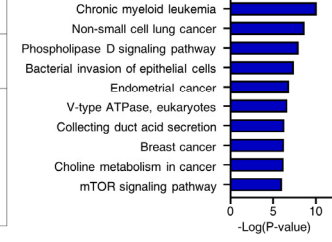

| Motif   | Sequence    | P-value  | Motif    | Sequence   | P-value |
|---------|-------------|----------|----------|------------|---------|
| Motif-1 | CACACCCAGC  | 1.00E-10 | Motif-7  | AAGFAGAT   | 1.00E-5 |
| Motif-2 | TCCTECTC    | 1.00E-8  | Motif-8  | TGATTTAG   | 1.00E-4 |
| Motif-3 | TCTCTCTC    | 1.00E-8  | Motif-9  | ATCATAGGA  | 1.00E-3 |
| Motif-4 | GAACTAGACCA | 1.00E-7  | Motif-10 | TCCGAAIT   | 1.00E-2 |
| Motif-5 | CCCTCCAC    | 1.00E-5  | Motif-11 | CCAAGATGTI | 1.00E-2 |
| Motif-6 | GGCACAAGCG  | 1.00E-5  | Motif-12 | FAAAGTCC   | 1.00E-2 |

**o**

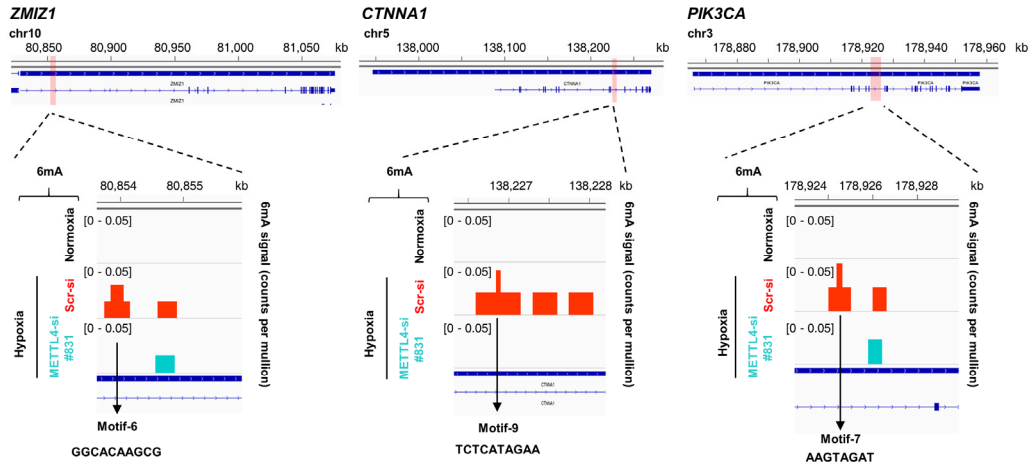

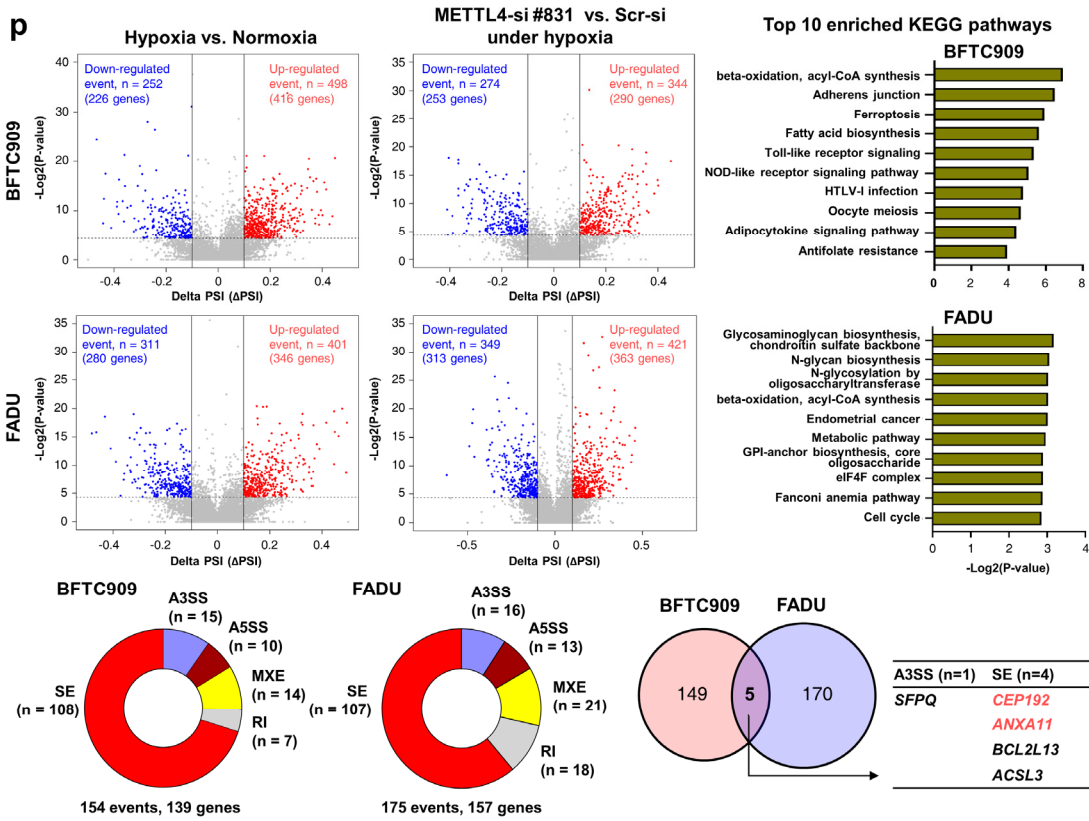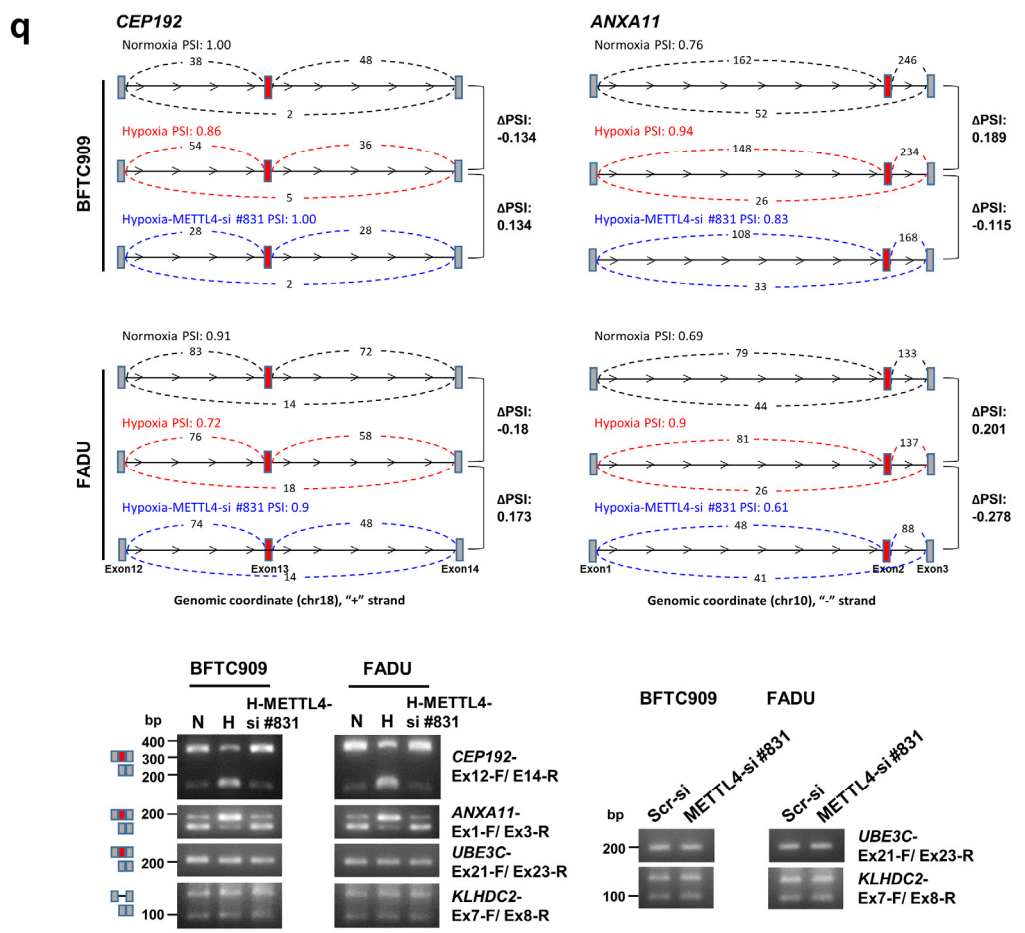

**r**

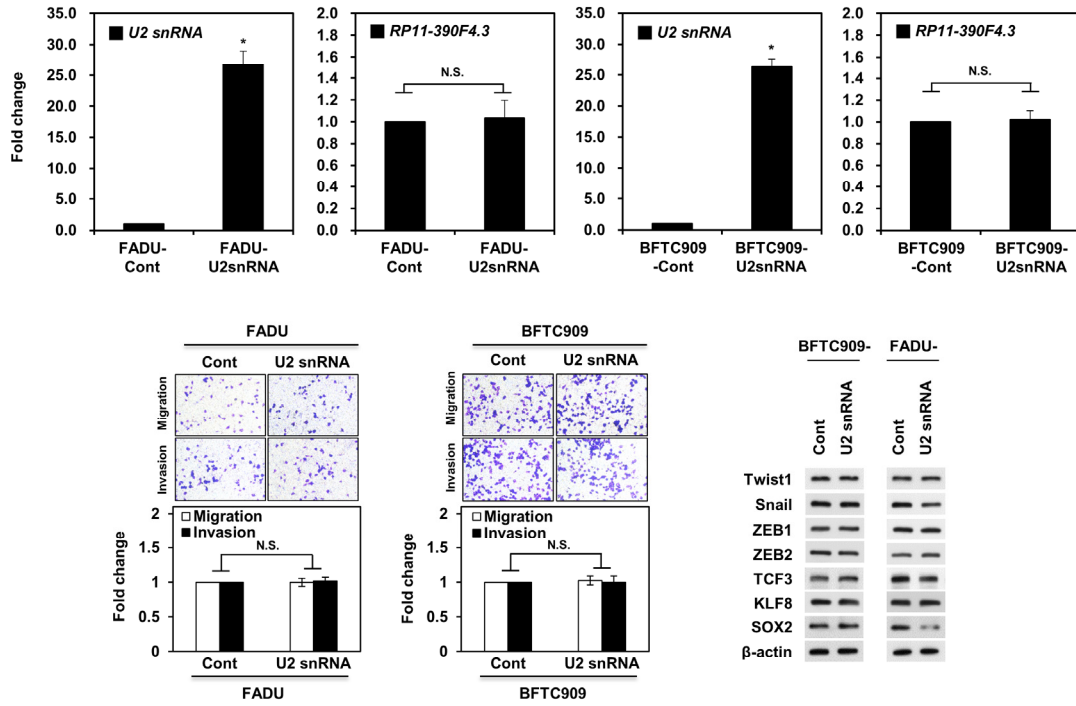

**s**

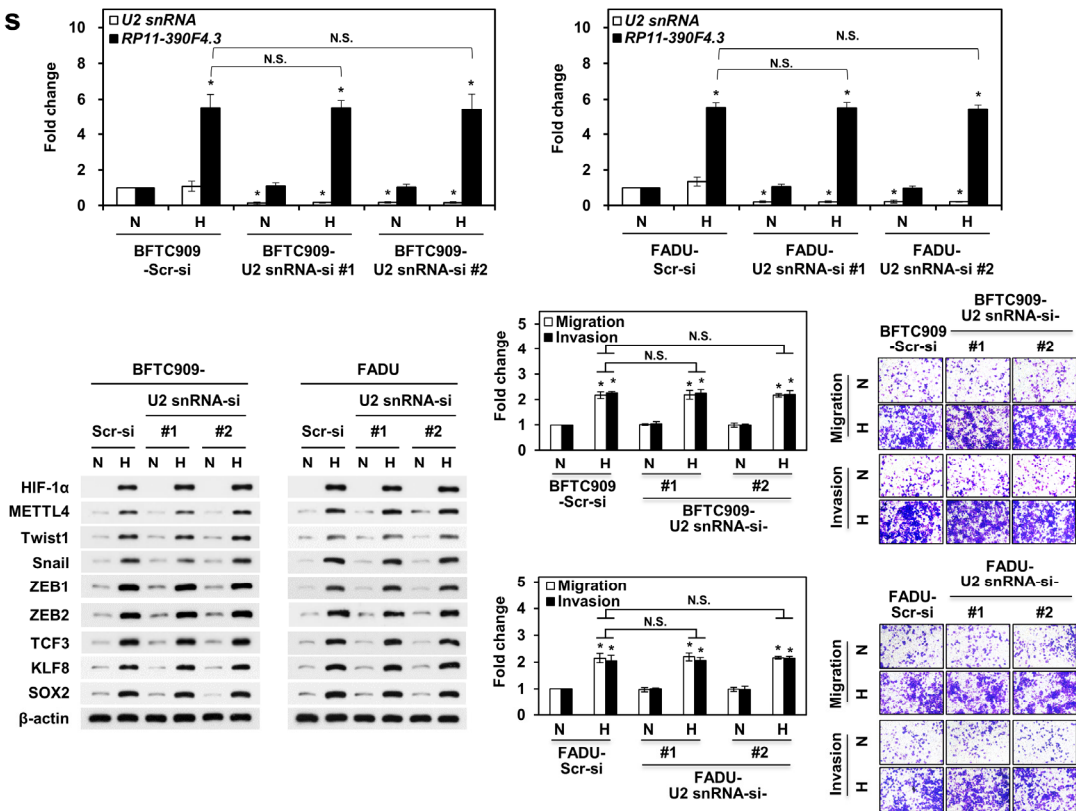



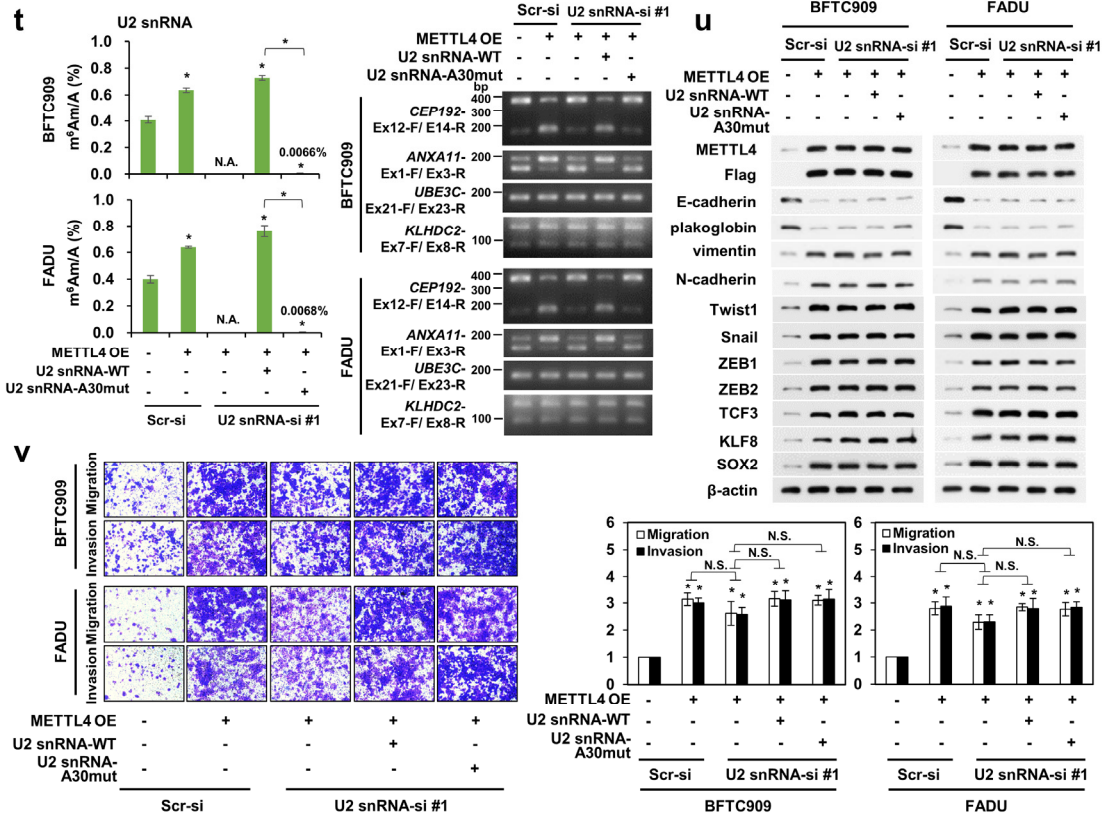



**Figure S4. GSEA of RNA-seq datasets, DE analysis of RNA-seq datasets, Western blot analysis of EMT regulators, signaling connection of METTL4 and lncRNA *RP11-390F4.3*, heatmap analysis of hypoxia-activated lncRNAs, quality control and correlation analysis of 6mA signals between different conditions, 6mA signal analysis and profiling using two different comparisons, consensus sequences of 6mA signal regions, examples of 6mA-deposited genes, profiling of differential RNA splicing events, confirmation of splicing event pattern changes, and knockdown of *U2 snRNA* followed by various assays.**

**(a-b)** Gene Set Enrichment Analysis (GSEA) showed two major gene sets (hypoxia and EMT) could be positively enriched in our RNA-seq results (hypoxia vs normoxia), and negatively enriched with knockdown of *METTL4* under hypoxia.

**(c)** Differential (DE) gene analysis showed the numbers of significantly regulated genes under hypoxia or *METTL4* knockdown under hypoxia in FADU and BFTC909 with the consideration of 1.3 positive/negative fold change with  $p$ -value < 0.05.

**(d)** Western blot analysis showed the multiple EMT regulators (Snai2, FOXC2, etc) that were not activated by lncRNA *RP11-390F4.3* overexpression in two different cell lines. The cell clone transfected with the control vector was used as a control.

**(e)** Knockdown of *METTL4* decreased the expression of lncRNA *RP11-390F4.3* under hypoxia in two different cell lines by real-time PCR analysis. Knockdown using the scrambled siRNA was used as a control. The asterisk (\*) indicated statistical significance ( $P < 0.05$ ) between experimental and control conditions.

**(f)** Heatmap analysis showed that most of the reported hypoxia-activated lncRNAs were up-regulated, but only some of them were regulated by *METTL4*.

**(g)** Gene ontology of different biological processes were shown for repressed genes co-regulated by hypoxia and *METTL4* (left panel). Gene Set Enrichment analysis (GSEA) showed that mitochondrial process, chromatin stability, and tRNA metabolic process were enriched in repressed genes co-regulated by hypoxia and *METTL4*.

**(h)** Quality control of 6mA-ChIP-exo-seq results showed the enriched fragment numbers from different sequencing datasets. The bar plot showed that a higher percentage of A could be enriched in 6mA ChIP-exo-seq (including WGA control). Genome-wide 6mA signal profiling across the genes in different conditions including normoxia (black), hypoxia (red) and hypoxic status undergoing *METTL4* knockdown (blue). Right lower panel showed the 6mA signals in hypoxia condition after subtracting WGA background signals.

**(i)** Correlation of differential 6mA region analysis between hypoxia and *METTL4* knockdown status under hypoxia showed a significant negative correlation in both results of comparison 1 and 2, indicating significant gain-of-6mA regions in red dots (comparison 1,  $n = 8,265$ ; comparison 2,  $n = 76,695$ ).

**(j)** Graph showed the log<sub>2</sub> fold change of 6mA signals generated from hypoxia-induced 6mA signal regions (after subtracting 6mA WGA control signals). Venn diagram showed the number of intersected 6mA signal regions between comparison 1, comparison 2, and hypoxia 6mA signal regions (after subtracting 6mA WGA control signals) and 3673 6mA signal regions were identified after the triple dataset overlapping.

**(k)** Correlation of hypoxia-induced/METTL4 dependent 6mA regulated regions with gene activation or gene repression was comparable. Graph showed the log<sub>2</sub> fold change of different RNA-seq comparison results of hypoxia vs. normoxia or hypoxic status undergoing METTL4 knockdown vs. hypoxia after correlating hypoxia-induced/METTL4 dependent 6mA to gene expression. In the result of hypoxia vs. normoxia, 408 increased-expression genes and 256 decreased-expression genes were shown. In the result of hypoxic status undergoing *METTL4* knockdown vs. hypoxia, 342 increased-expression genes and 387 decreased-expression genes were shown.

**(l)** Venn diagram showed that after overlapping gene expression data with hypoxia-induced/METTL4 dependent gain-of-6mA regions, 263 genes were identified as hypoxia-induced/METTL4 dependent 6mA regulated genes. Analyses of 6mA ChIP-exo-seq and RNA-seq datasets from FADU cells were performed. The top 10 enriched KEGG pathways in hypoxia-induced/METTL4 dependent 6mA regulated genes were shown.

**(m)** After overlapping hypoxia-induced/METTL4 dependent 6mA regulated genes with HIF-1 $\alpha$  ChIP-seq data, 54 HIF-1 $\alpha$  assembly-dependent genes and 209 HIF-1 $\alpha$  assembly-independent genes were categorized. After functional gene ontology annotation of genes without HIF-1 $\alpha$  assembly to their loci, three major cellular functional pathways induced by hypoxia (angiogenesis, stemness, and cancer metabolism) were categorized. The results of top 10 enriched KEGG pathways in 6mA-upregulated genes with or without HIF-1 $\alpha$  assembly to their loci were shown.

**(n)** 6mA motifs were calculated by HOMER from the 6mA signals in hypoxia-induced/METTL4 dependent gain-of-6mA regions from up-regulated genes. *P*-values were shown on the right of each motif.

**(o)** The examples of hypoxia-induced/METTL4 dependent 6mA up-regulated gene (*ZMIZ1*) and two 6mA-upregulated genes without HIF-1 $\alpha$  assembly to their loci (*CTNNA1*-stemness, and *PIK3CA*-cancer metabolism) were shown. All three genes contained 6mA consensus motifs in their introns. Different 6mA motifs calculated by HOMER were identified on the intron 1 of *ZMIZ1* (homology with motif-6) and different motifs homologous to the different consensus sequences were indicated underneath the intron of *CTNNA1* (motif-9), and *PIK3CA* (motif-7) genes. A magnified window around the designated motif area for each gene was shown. Only motif-6 on the intron 1 of *ZMIZ1*, motif-9 on the intron 10 of *CTNNA1*, and motif-7 on the intron

6 of *PIK3CA* were shown. These motifs were further analyzed on Fig. S6.

**(p)** Volcano plots showed the genome-wide alternative splicing event analysis through comparison of hypoxia vs. normoxia and METTL4-si vs. scrambled-si under hypoxia in BFTC909 and FADU cells. Up-regulated events were shown in red dots and down-regulated events were shown in blue dots (left upper part). Pie plots showed the number of different differential splicing events regulated by METTL4 under hypoxia in BFTC909 (A3SS, n = 15; A5SS, n = 10; MXE, n = 14; RI, n = 7; SE, n = 108) and FADU (A3SS, n = 16; A5SS, n = 13; MXE, n = 21; RI, n = 18; SE, n = 107) cells (left lower part). Bar graphs showed the top 10 enriched KEGG pathways of differential splicing events in BFTC909 and FADU cells (right upper part). Venn diagram showed 5 events (A3SS, n = 1; SE, n = 4) that were regulated by METTL4 under hypoxia in both BFTC909 and FADU cells (right lower part). A3SS, alternative 3' sites; A5SS, alternative 5' sites; MXE, mutually exclusive exons; RI, retention of introns; SE, skipped exon.

**(q)** Graphs showed the differential splicing events (exon inclusion or exclusion) of *CEP192* and *ANXA11* in the condition of hypoxia vs. normoxia and METTL4-si vs. scrambled-si under hypoxia in BFTC909 and FADU cells (upper part). Validation of alternative splicing events in the *CEP192*, *ANXA11*, *UBE3C*, and *KLHDC2* genes by RT-PCR with gene-specific primers. The identity of splicing products by exon inclusion or exclusion is schematically shown next to the gels. Differential splicing of *CEP192* and *ANXA11* genes were regulated by hypoxia and returned to the original splicing pattern under METTL4 knockdown (left lower part). The *UBE3C* and *KLHDC2* genes were not regulated by hypoxia or METTL4 (right lower part).

**(r)** Overexpression of *U2 snRNA* did not increase the mRNA levels of *RP11-390F4.3*, the *in vitro* migration/invasion activity, or the protein levels of various EMT regulators in two cell lines. Representative photos of the *in vitro* migration and invasion activity were shown in this panel. The cell clone transfected with the control vector was used as a control. The asterisk (\*) indicated statistical significance ( $P < 0.05$ ) between experimental and control groups. N.S., not statistically significant.

**(s)** Knockdown of *U2 snRNA* did not change the RNA levels of *RP11-390F4.3*, the protein levels of different EMT regulators induced by hypoxia, or the *in vitro* migration/invasion activity induced by hypoxia. Representative photos of the *in vitro* migration and invasion activity were shown. Two different siRNAs were used to knockdown *U2 snRNA*. N, normoxia; H, hypoxia. Knockdown using the scrambled siRNA under normoxia condition was used as a control. The asterisk (\*) indicated statistical significance ( $P < 0.05$ ) between experimental and control conditions. N.S., not statistically significant.

**(t)** The m6Am methylation levels of these reconstituted *U2 snRNAs* (wild type vs. A30

point mutant) were measured by UPLC-ESI-MS/MS (left part). Knockdown of *U2 snRNA* under METTL4 overexpression status followed by reconstitution with either wild type *U2 snRNA* or point mutant *U2 snRNA* experiments were performed. Assays of differential splicing showed that wild type *U2 snRNA* was able to rescue the differential splicing events of *CEP192* and *ANXA11* induced by METTL4 overexpression, but not the A30-mutated *U2 snRNA* (right part).

(u) Knockdown of *U2 snRNA* under METTL4 overexpression status followed by reconstitution with either wild type *U2 snRNA* or point mutant *U2 snRNA* did not change the protein levels of various EMT regulators or EMT markers by Western blot analysis.

(v) Knockdown of *U2 snRNA* under METTL4 overexpression status followed by reconstitution with either wild type *U2 snRNA* or point mutant *U2 snRNA* did not change the *in vitro* migration and invasion activity of two different cell lines. Representative photos of the *in vitro* migration and invasion activity were shown. Knockdown using the scrambled siRNA was used as a control. The asterisk (\*) indicated statistical significance ( $P < 0.05$ ) between experimental and control groups. N.S., not statistically significant.

**Figure S5**

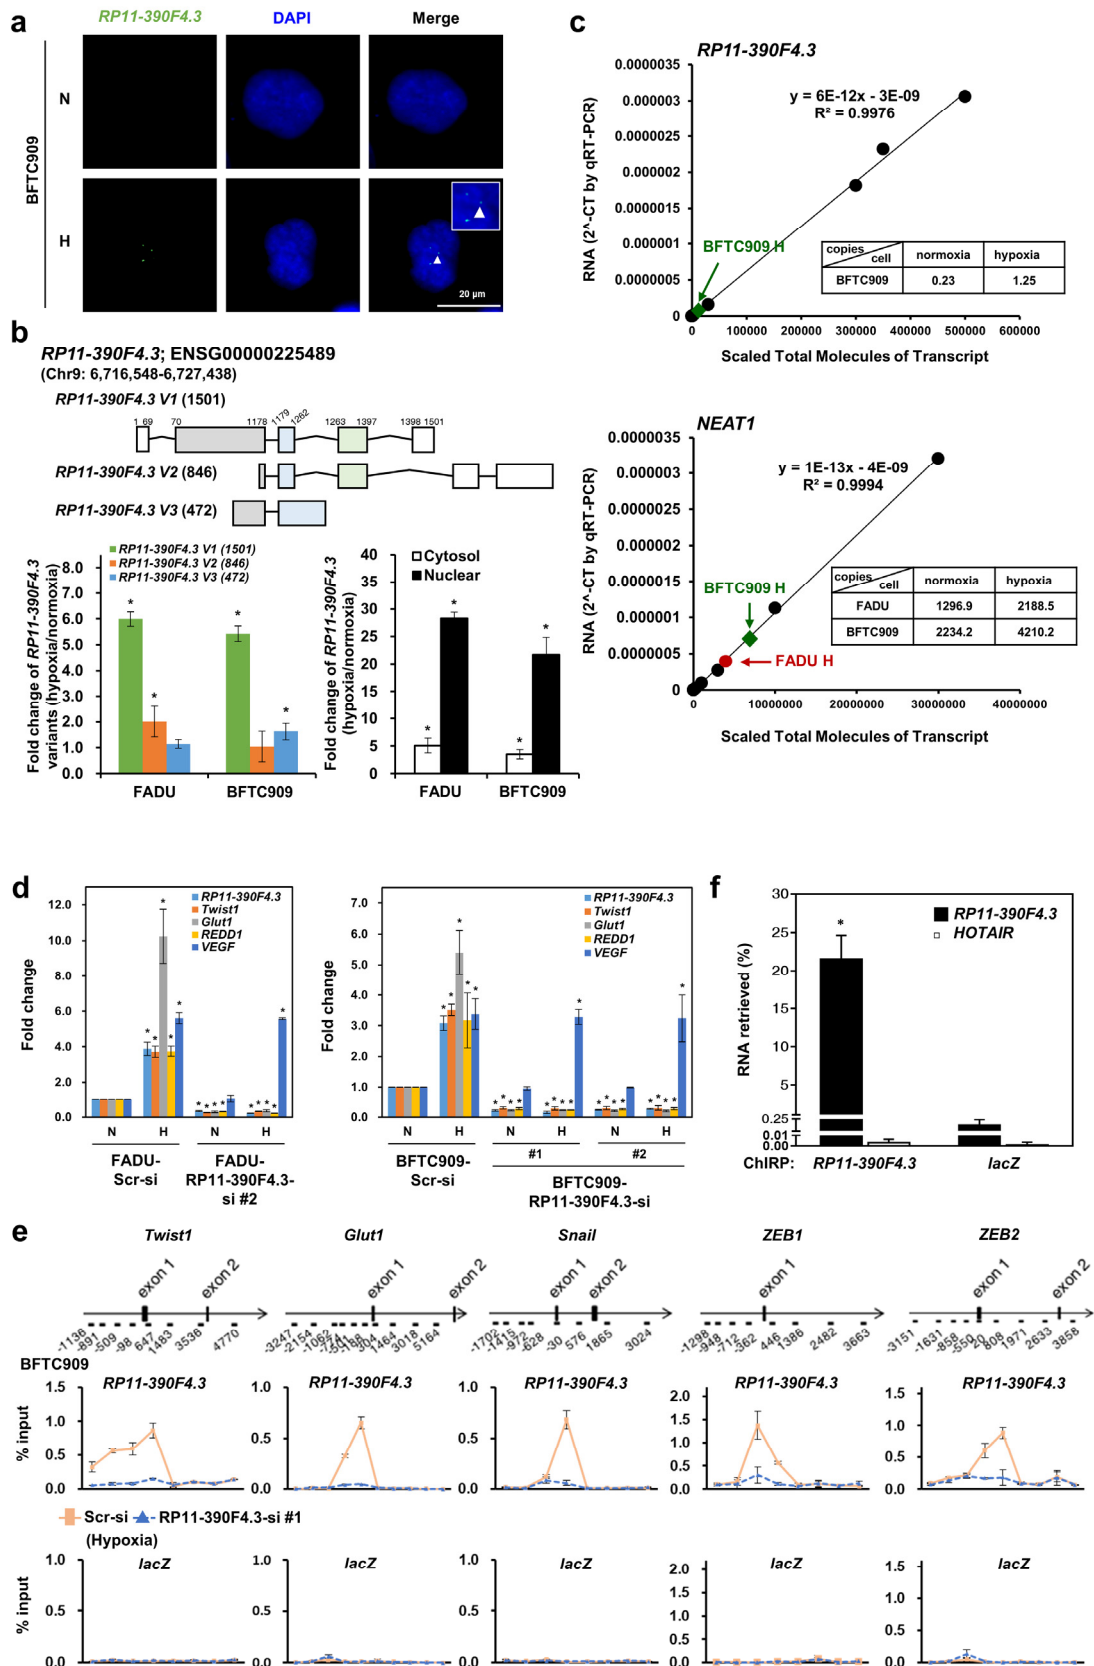

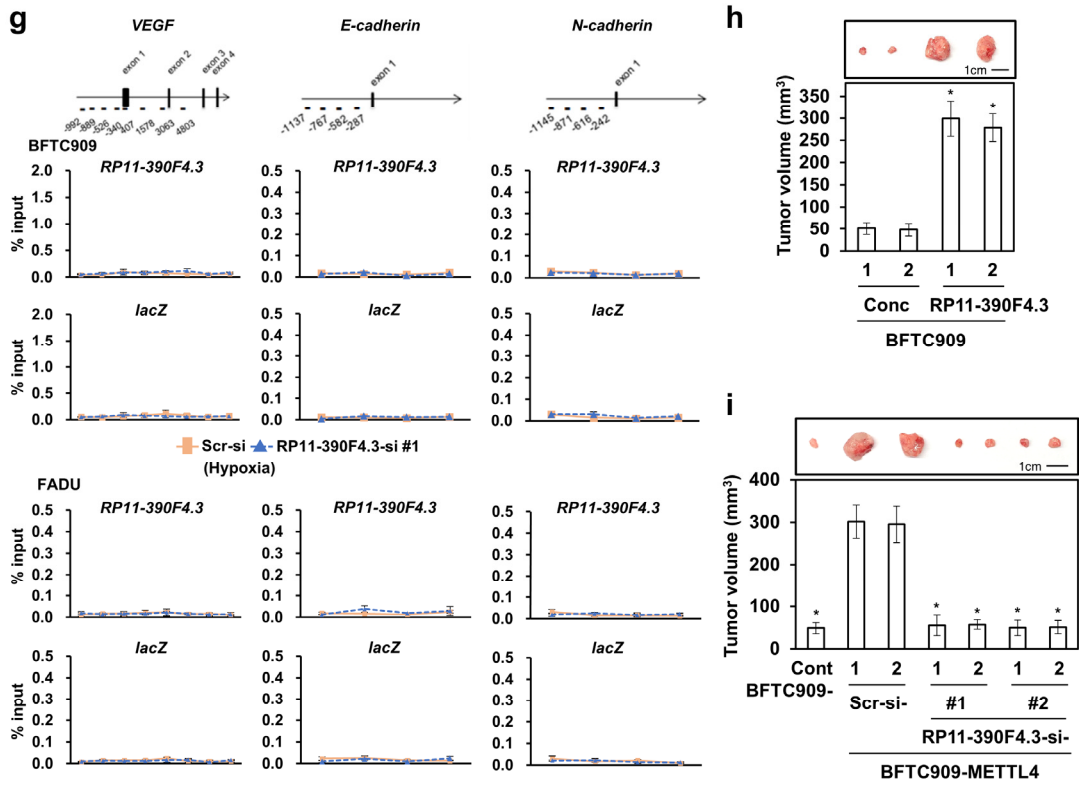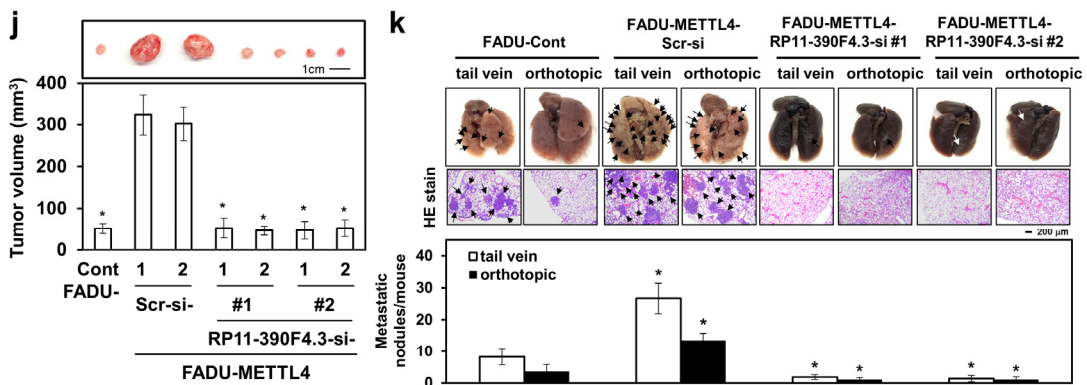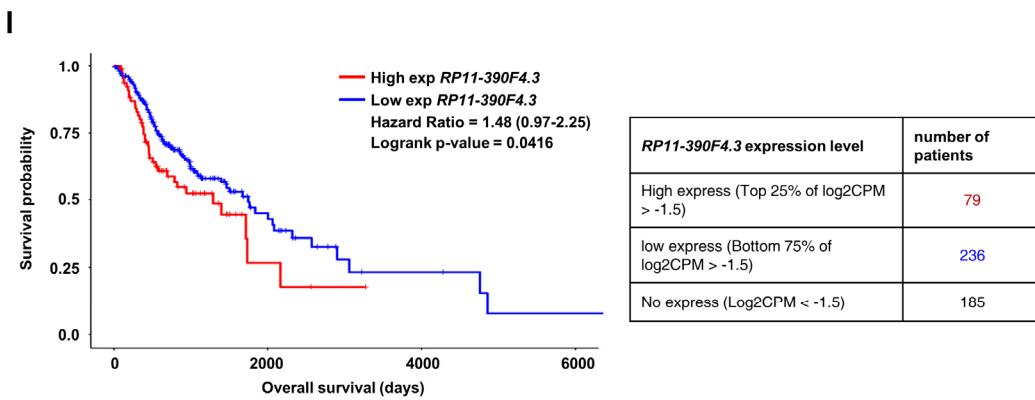

**Figure S5. RNA FISH assay, analysis of different versions of lncRNA *RP11-390F4.3*, copy number of lncRNA *RP11-390F4.3*, ChIRP peaks of three different EMT regulator genes, *in vivo* tumorigenicity assay of lncRNA *RP11-390F4.3*, and the TCGA survival analysis of head and neck cancer patient groups with high lncRNA *RP11-390F4.3* levels.**

**(a)** RNA FISH staining showed the increased nuclear staining of lncRNA *RP11-390F4.3* in BFTC909 cells under hypoxia. Cell nuclei were stained by DAPI. The white frame line represents the result of the magnification of the cell. N, normoxia; H, hypoxia. Normoxic condition was used as a control.

**(b)** lncRNA *RP11-390F4.3* V1 had the highest fold of activation (~4 to 6 fold) inside nucleus in FADU and BFTC909 cells using real-time PCR analysis. The diagram shows the genotypes of different variants of lncRNA *RP11-390F4.3* V1 to V3 (upper panel). Normoxic condition was used as a control. The asterisk (\*) indicated statistical significance ( $P < 0.05$ ) between experimental and control groups.

**(c)** Measurement of the copy number of lncRNA *RP11-390F4.3* or *NEAT1* in BFTC909 and FADU cells (normoxia vs. hypoxia). Titration standard curve was used for measurement of the copy number of lncRNA *RP11-390F4.3* or *NEAT1* per 500,000 cells. The green and red points represent the real-time PCR value from a standard sample of 500,000 BFTC909 and FADU cells under hypoxia.

**(d)** Knockdown of lncRNA *RP11-390F4.3* significantly decreased the induction of various HIF-1 $\alpha$  target genes using real-time PCR analysis in BFTC909 and FADU cells (normoxia vs. hypoxia). Knockdown using the scrambled siRNA under normoxia condition was used as a control. Two different siRNAs were used to knockdown *RP11-390F4.3* in BFTC909 cells N, normoxia; H, hypoxia. The asterisk (\*) indicated statistical significance ( $P < 0.05$ ) between experimental and control clones.

**(e-g)** qChIRP assays showed the significantly decreased lncRNA *RP11-390F4.3* binding to the promoter regions of EMT regulator and *Glut1* genes in hypoxic BFTC909 cells undergoing lncRNA *RP11-390F4.3* knockdown compared to the control knockdown hypoxic cells. The genomic regions of *Twist1*, *Glut1*, *Snail*, *ZEB1*, and *ZEB2* genes and the regions that were checked by qChIRP assays were shown on the top. Different regions located in the promoters and inside the gene body of these genes were shown underneath the plotting of genes. The different numbers indicated the starting nucleotide positions in the regions (labeled by brackets) before and after the initiation site. Retrieval of lncRNA *RP11-390F4.3*, but not *HOTAIR*, by tiling probes was shown **(f)**. The promoters of *VEGF*, *E-cadherin*, and *N-cadherin* were used as a negative control **(g)**.

**(h)** Overexpression of lncRNA *RP11-390F4.3* increased the tumor volume of BFTC909 cells using xenograft implantation assays. The cell clone transfected with the



control vector was used as a control. The asterisk (\*) indicated statistical significance ( $P < 0.05$ ) between experimental and control groups.

**(i-j)** Knockdown of lncRNA *RP11-390F4.3* in METTL4-overexpressing BFTC909 **(i)** and FADU **(j)** cells significantly decreased the tumor volume induced by METTL4. The cell clone transfected with the control vector was used as a control. The asterisk (\*) indicated statistical significance ( $P < 0.05$ ) between experimental and control groups.

**(k)** Knockdown of lncRNA *RP11-390F4.3* in FADU cells overexpressing METTL4 significantly decreased the metastatic lung nodules in mice. Representative gross anatomy and histology were shown on the upper panel and measurement of metastatic lung nodules was shown on the lower panel. The cell clone transfected with the control vector was used as a control. The asterisk (\*) indicated statistical significance ( $P < 0.05$ ) between experimental and control groups.

**(l)** Increased expression of lncRNA *RP11-390F4.3* indicated a poor prognosis in head and neck cancer patients from the TCGA dataset analysis.

The error bars represented the standard deviation (SD). Student's *t*-test was used to compare two groups of independent samples. For details, see method section.

**Figure S6**

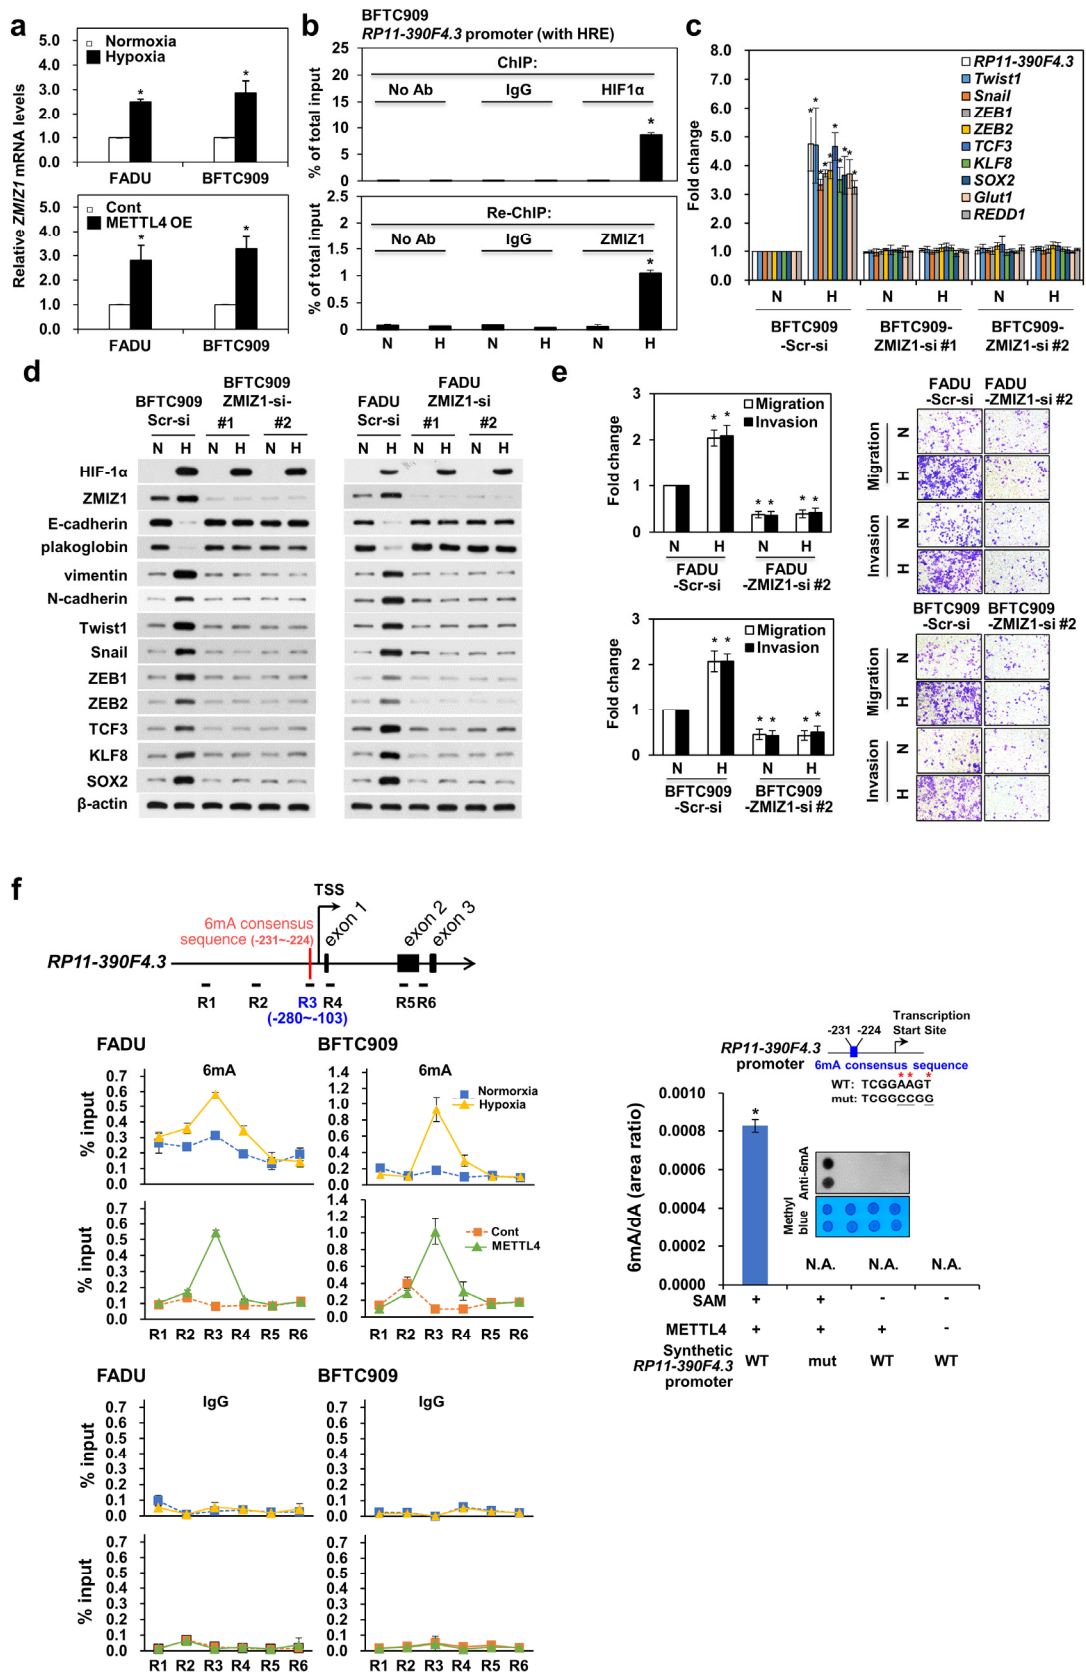

**g**

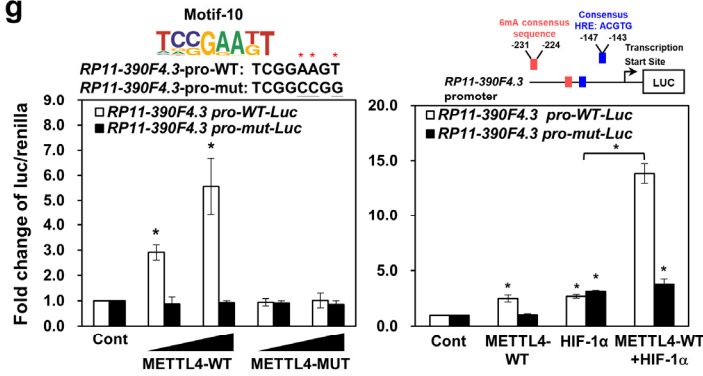

**h**

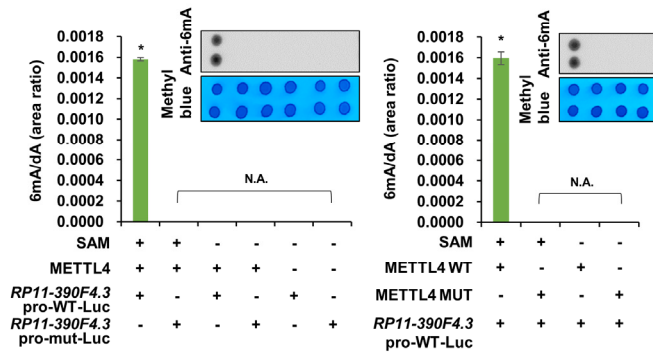

**i**

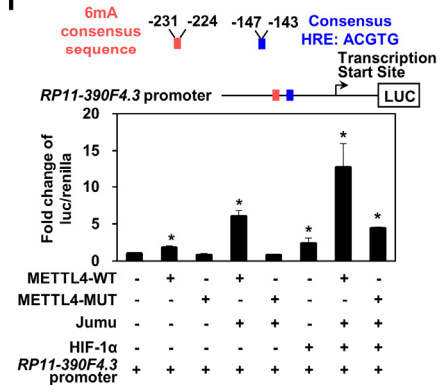

**j**

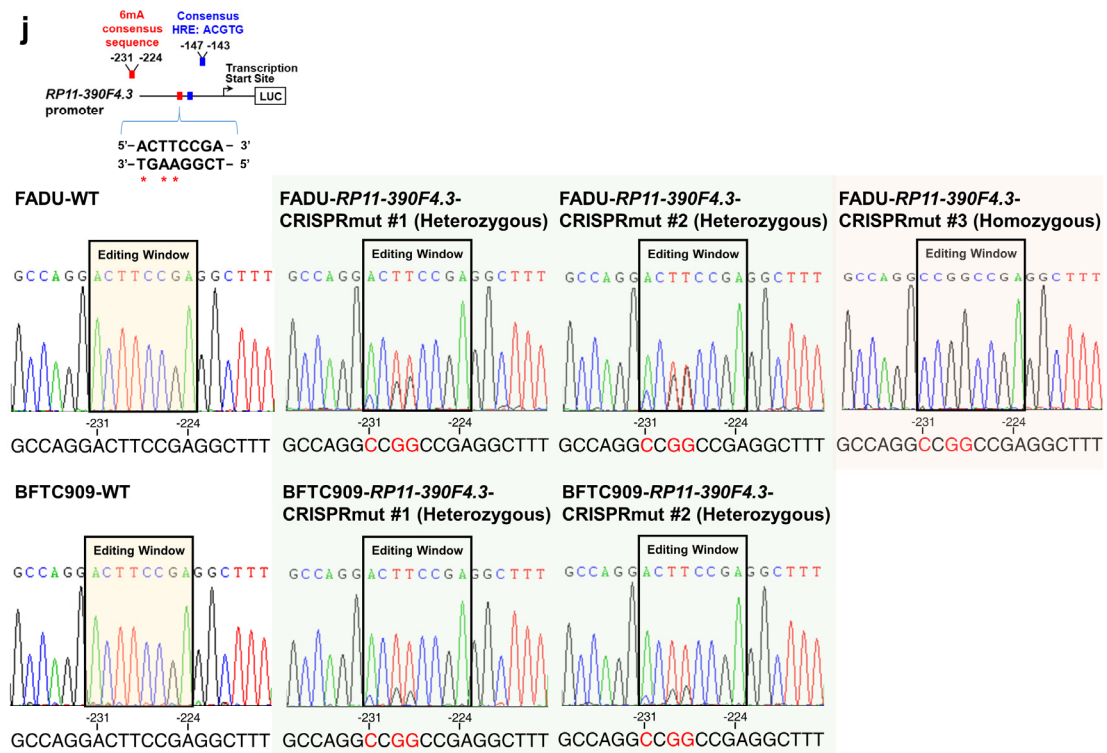

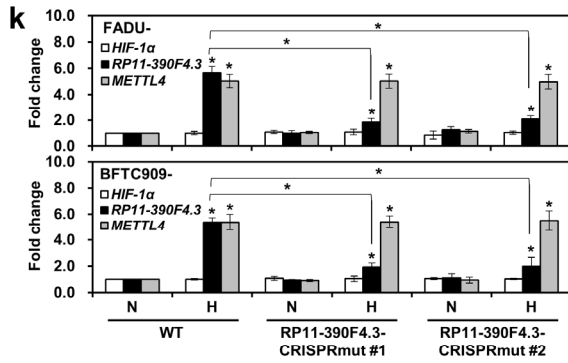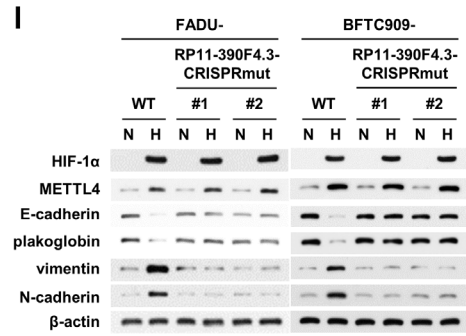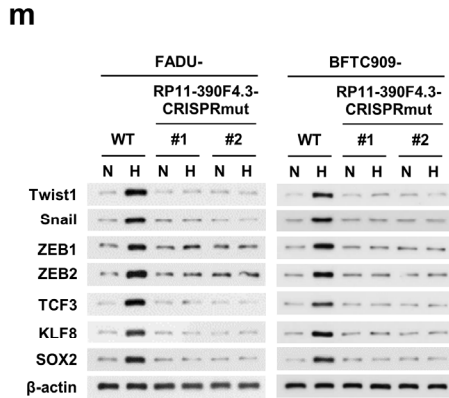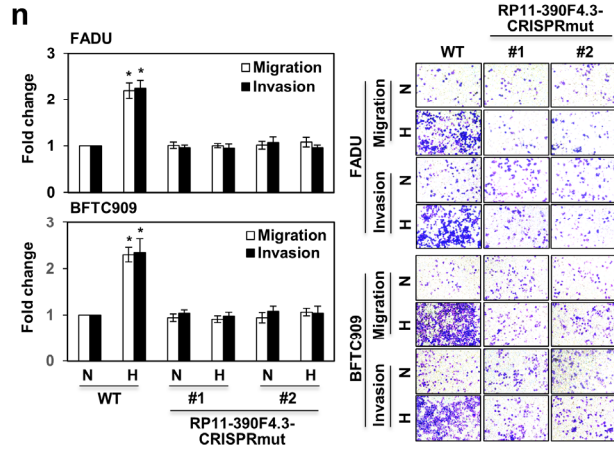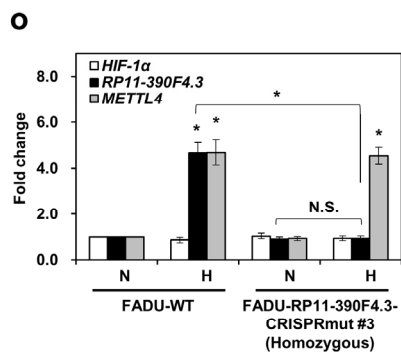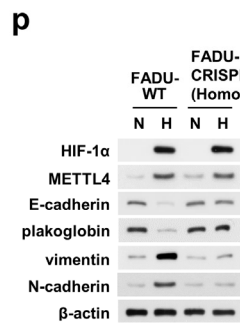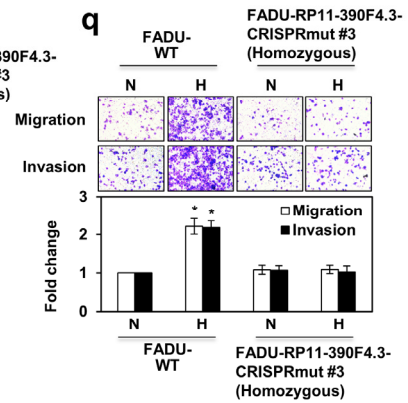

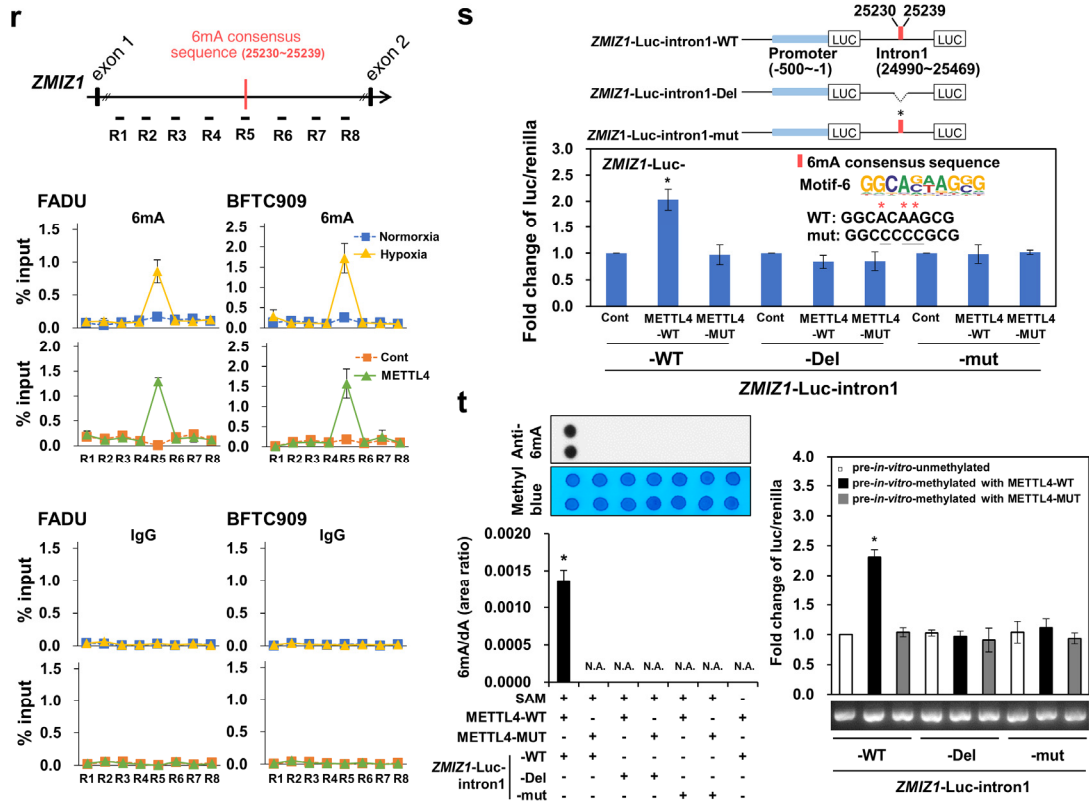

**W**

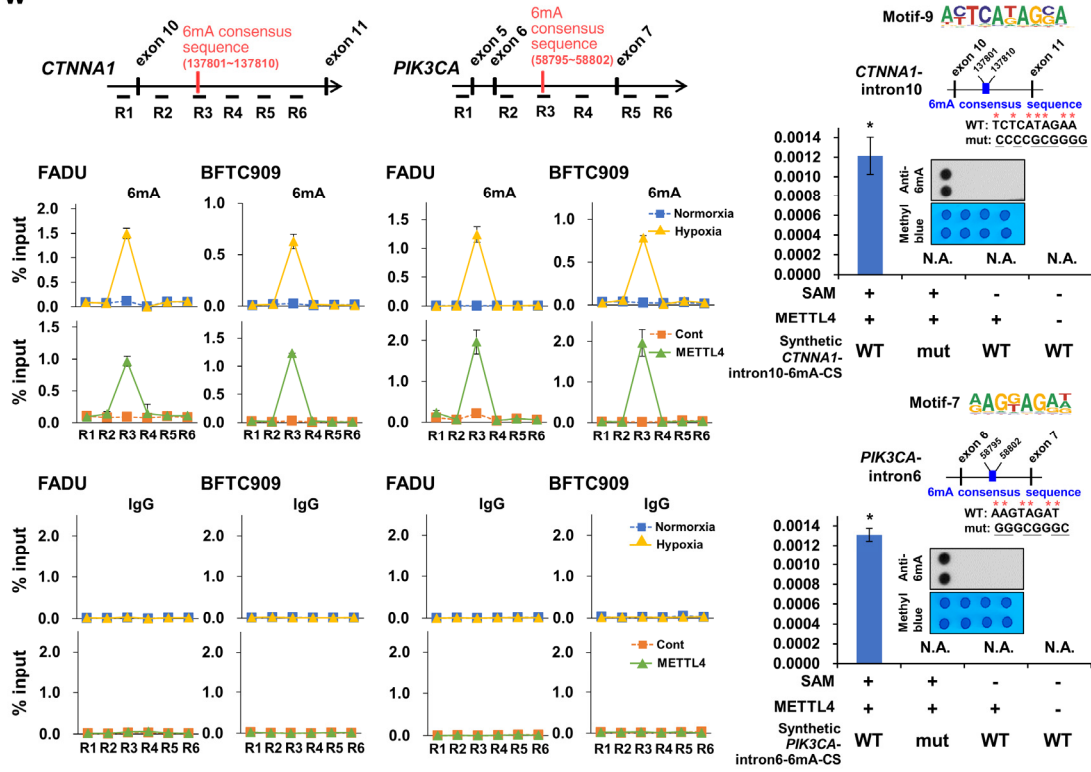

**X**

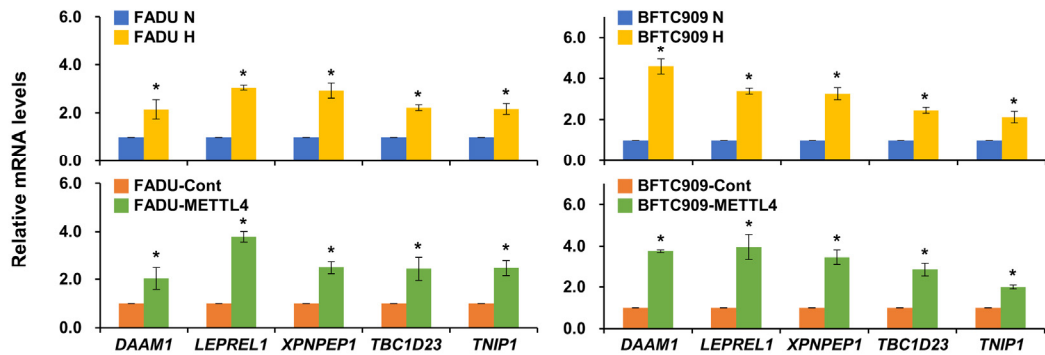



**y**

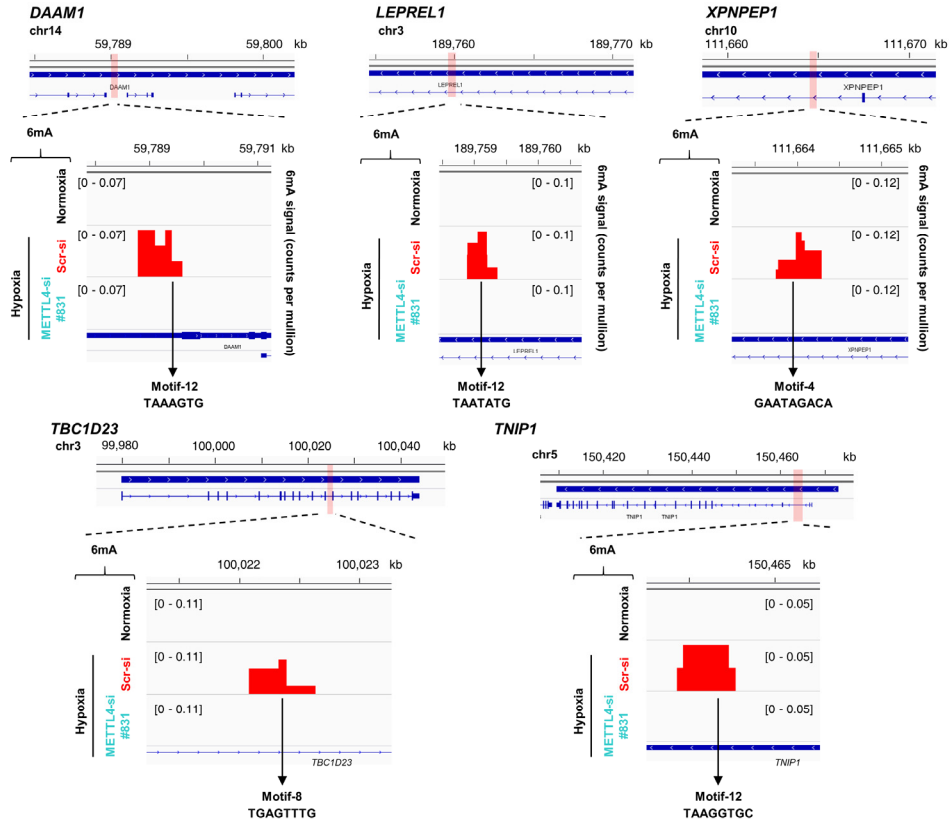

**z**

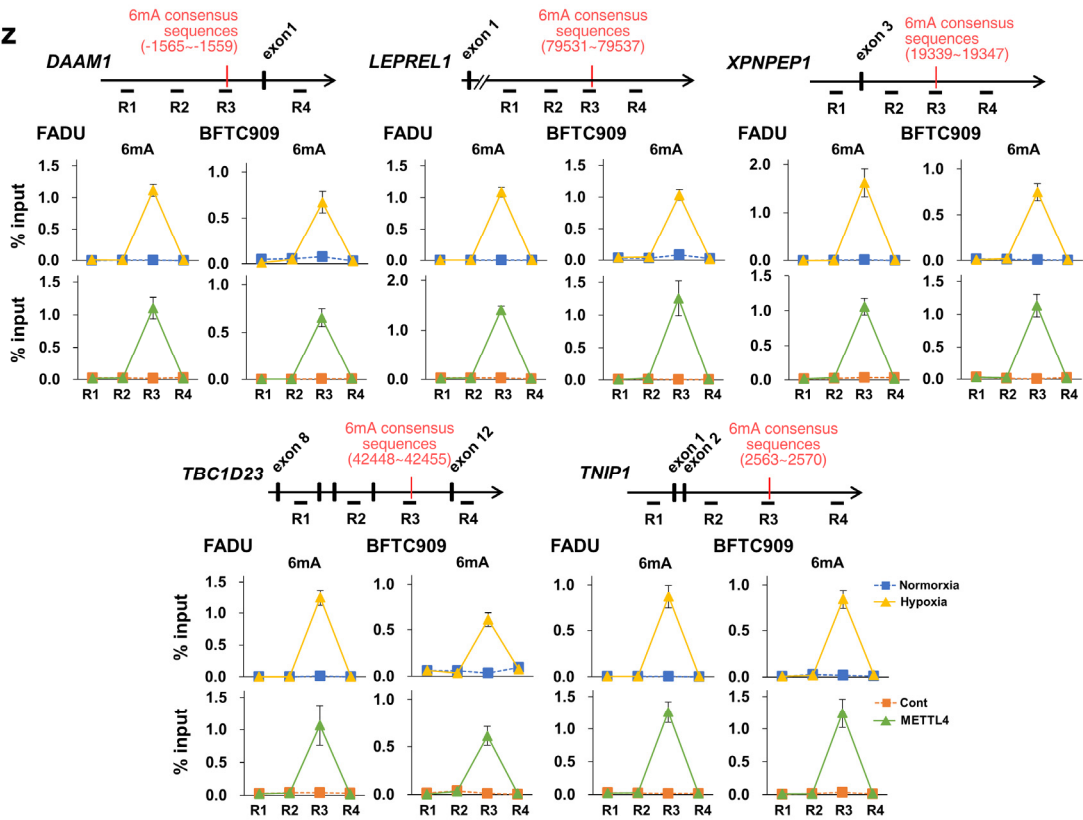



**Figure S6. Real-time PCR analysis of gene expression, ChIP-re-ChIP assays, Western blot analysis and *in vitro* migration/invasion activity of two cell lines with *ZMIZ1* knockdown under hypoxia, *in vitro* DNA methylation assays to confirm the 6mA sites methylated by METTL4, the activation of the 6mA site-containing *ZMIZ1* reporter gene construct by METTL4, DNA sequencing analysis of 6mA site mutation on the lncRNA *RP11-390F4.3* promoter, real-time PCR, Western blot, and *in vitro* migration/invasion activity assays of cells with heterozygous or homozygous mutation of the 6mA site on the lncRNA *RP11-390F4.3* promoter, reporter gene assays of the pre-methylated *ZMIZ1* reporter construct, and *in vitro* methylation assays to the 6mA site on the introns of *CTNNA1* or *PIK3CA* gene.**

**(a)** Hypoxia or METTL4 overexpression increased the *ZMIZ1* mRNA levels in FADU and BFTC909 cell lines. The asterisk (\*) indicated statistical significance ( $P < 0.05$ ) between experimental and control groups. Normoxic condition and the cell clone transfected with the control vector were used as a control.

**(b)** ChIP-re-ChIP assays in BFTC909 cell showed that *ZMIZ1* could be pulled down after chromatin immunoprecipitation to pull down HIF-1 $\alpha$ , indicating the co-existence of HIF-1 $\alpha$  and *ZMIZ1* in the transcription complex on the lncRNA *RP11-390F4.3* promoter (with hypoxia response element, HRE). N, normoxia; H, hypoxia. No antibody/normoxia condition was used as a control. The asterisk (\*) indicated statistical significance ( $P < 0.05$ ) between experimental and control groups.

**(c)** Knockdown of *ZMIZ1* significantly decreased the induction of various HIF-1 $\alpha$  target genes in BFTC909 cells by real-time PCR analyses. Two different siRNAs were used to knockdown *ZMIZ1*. Knockdown using the scrambled siRNA under normoxia condition was used as a control. N, normoxia; H, hypoxia. The asterisk (\*) indicated statistical significance ( $P < 0.05$ ) between experimental and control condition.

**(d)** Knockdown of *ZMIZ1* abolished hypoxia-induced EMT in BFTC909 and FADU cell lines by Western blot analysis. Knockdown using the scrambled siRNA under normoxia condition was used as a control. N, normoxia; H, hypoxia. The asterisk (\*) indicated statistical significance ( $P < 0.05$ ) between experimental and control condition.

**(e)** Knockdown of *ZMIZ1* decreased the *in vitro* migration and invasion activity induced by hypoxia in FADU or BFTC909 cell lines. A different siRNA (compared to the siRNA used in Fig. 6d) was used to knockdown *ZMIZ1* gene. This experiment was performed at a different time (compared to Fig. 6d). Representative photos of the *in vitro* migration and invasion activity were shown in this panel. N, normoxia; H, hypoxia. Knockdown using the scrambled siRNA under normoxia condition was used as a control. The asterisk (\*) indicated statistical significance ( $P < 0.05$ ) between experimental and control groups.

**(f)** MeDIP assays showed the presence of 6mA site on the promoter of lncRNA *RP11-*

*390F4.3*. IgG was used as a control. The figure above shows the 6mA consensus sequence (-231 to -224 upstream of TSS of the lncRNA *RP11-390F4.3* gene) in the promoter R3 region (-280 to -103 upstream of TSS) of the lncRNA *RP11-390F4.3* gene. METTL4 increased the 6mA levels on the oligonucleotides containing the motif-10 of the lncRNA *RP11-390F4.3* promoter using *in vitro* methylation assays, whereas no increased 6mA levels could be shown on the oligonucleotides containing mutated 6mA sequences. The oligonucleotide only was used as a control. The asterisk (\*) indicated statistical significance ( $P < 0.05$ ) between experimental and control groups. Corresponding 6mA dot blots with methyl blue loading controls were shown together with bar graphs.

**(g)** Reporter gene assays showed that METTL4, but not the METTL4 mutant, activated the lncRNA *RP11-390F4.3* gene promoter driven reporter construct. No activation of the lncRNA *RP11-390F4.3* gene promoter driven reporter constructs when the 6mA consensus sequence was mutated. The 6mA consensus sequence of wild type and mutant on the lncRNA *RP11-390F4.3* gene promoter are shown in the top (left panel). METTL4 and HIF-1 $\alpha$  synergistically activated the *RP11-390F4.3* promoter-driven reporter construct that contained a 6mA consensus sequence (-231 to -224 upstream of TSS of the *RP11-390F4.3* gene) and a HIF-1 $\alpha$  response element (HRE, -147 to -143 upstream of TSS of the *RP11-390F4.3* gene) (right panel). No synergistic activation of the *RP11-390F4.3* promoter-driven reporter constructs when the 6mA consensus sequence was mutated. The position of the 6mA consensus sequence on the *RP11-390F4.3* promoter and the 6mA consensus sequence of wild and mutation are shown in the figure above (right panel). The luciferase/renilla activities of FADU cells co-transfected with reporter construct and pcDNA3 control vector under normoxia were used as the baseline control. The asterisk (\*) indicated statistical significance ( $P < 0.05$ ) between experimental and control groups.

**(h)** The 6mA levels of the *RP11-390F4.3*-driven wild type reporter construct that underwent *in vitro* methylation (vs. a 6mA-site mutated reporter construct) was measured via UPLC-ESI-MS/MS assays (left panel). 6mA methylation was mediated by wild type METTL4, not by the mutated METTL4 (right panel). The reporter construct without incubating with wild type METTL4 and SAM was used as a control. The asterisk (\*) indicated statistical significance ( $P < 0.05$ ) between experimental and control groups. Corresponding 6mA dot blots with methyl blue loading controls were shown together with bar graphs.

**(i)** Reporter gene assays showed that METTL4, HIF-1 $\alpha$ , and Jumu (a *Drosophila* 6mA-binding protein) synergistically activated the *RP11-390F4.3* promoter-driven reporter construct that contained a 6mA consensus sequence. The figure above shows the positions of the 6mA consensus sequence and the consensus HRE on the *RP11-390F4.3*

promoter. The luciferase/renilla activities of FADU cells co-transfected with reporter construct and pcDNA3 control vector under normoxia were used as the baseline control. The asterisk (\*) indicated statistical significance ( $P<0.05$ ) between experimental and control group.

**(j)** Representative sequencing results of the *in vivo* mutation of the 6mA site on the *RP11-390F4.3* promoter in FADU and BFTC909 cells using a prime-cutting CRISPR-Cas9 approach were shown. Mut #3 in FADU cells represented the homozygous mutations of the 6mA site. The wild-type (WT) cells was used as a control.

**(k)** Mutation of one copy of the 6mA site on the promoter of *RP11-390F4.3* gene already reduced the activation of *RP11-390F4.3* down to ~30% of the wild type *RP11-390F4.3* expression induced by hypoxia in FADU and BFTC909 cells. N, normoxia; H, hypoxia. Normoxic condition of the WT cell line was used as a control. The asterisk (\*) indicated statistical significance ( $P<0.05$ ) between experimental and control conditions.

**(l-m)** The regulation of EMT markers and regulators mediated by hypoxia was abolished in the *RP11-390F4.3* 6mA site heterozygous mutated clones in FADU and BFTC909 cells by Western blot analysis. N, normoxia; H, hypoxia.

**(n)** The activation of *in vitro* migration and invasion activity induced by hypoxia was abolished in the *RP11-390F4.3* 6mA site heterozygous mutated clones in FADU and BFTC909 cells. Representative photos of the *in vitro* migration and invasion activity were shown on the right. N, normoxia; H, hypoxia. Normoxic condition of the WT cell line was used as a control. The asterisk (\*) indicated statistical significance ( $P<0.05$ ) between experimental and control conditions.

**(o)** The activation of *RP11-390F4.3* by hypoxia was totally abolished in the *RP11-390F4.3* 6mA site homozygous mutated clone in FADU cells. N, normoxia; H, hypoxia. Normoxic condition of the WT cell line was used as a control. The asterisk (\*) indicated statistical significance ( $P<0.05$ ) between experimental and control conditions. N.S., not statistically significant.

**(p)** The regulation of EMT markers mediated by hypoxia was abolished in the *RP11-390F4.3* 6mA site homozygous mutated clone in FADU cells. N, normoxia; H, hypoxia.

**(q)** The activation of *in vitro* migration and invasion activity induced by hypoxia was abolished in the *RP11-390F4.3* 6mA site homozygous mutated clone in FADU cells. Representative photos of the *in vitro* migration and invasion activity were shown. N, normoxia; H, hypoxia. Normoxic condition of the WT cell line was used as a control. The asterisk (\*) indicated statistical significance ( $P<0.05$ ) between experimental and control conditions.

**(r)** MeDIP assays showed the presence of 6mA site on the intron 1 of the *ZMIZ1* gene. IgG was used as a control. The figure above showed the 6mA consensus sequence (25230 to 25239, from the TSS of *ZMIZ1* gene) in the intron 1 R5 region of *ZMIZ1*

gene.

(s) The reporter construct containing the 6mA consensus sequence (25230 to 25239, start from the *ZMIZ1* gene) in the intron 1 region (24990 to 25469, start from the *ZMIZ1* gene) of *ZMIZ1* was activated by co-expressing METTL4, but not the reporter construct containing the deleted or mutated 6mA sites. The 6mA consensus sequence of wild-type and mutation on the intron 1 of *ZMIZ1* are shown in the top. The luciferase/renilla activities of FADU cells co-transfected with reporter construct and pcDNA3 control vector under normoxia were used as the baseline control. The asterisk (\*) indicated statistical significance ( $P<0.05$ ) between experimental and control groups.

(t) The 6mA levels of the *ZMIZ1* intron 1-driven wild type reporter construct that underwent *in vitro* methylation (vs. a 6mA-site deleted or mutated reporter construct) was measured via UPLC-ESI-MS/MS assays. 6mA methylation was mediated by wild type METTL4, not by the mutated METTL4. The reporter construct without incubating with wild type METTL4 was used as a control. The asterisk (\*) indicated statistical significance ( $P<0.05$ ) between experimental and control groups. Corresponding 6mA dot blots with methyl blue loading controls were shown together with bar graphs. Reporter gene assays showed that the 6mA site pre-methylated *ZMIZ1* intron 1-driven reporter construct had higher luciferase activities compared to the unmethylated construct after transfection. The 6mA site deleted or mutated reporter construct also had only baseline luciferase activities. *In vitro* methylation experiments were performed to generate the 6mA site pre-methylated reporter construct. The luciferase/renilla activities of FADU cells co-transfected with reporter construct and pcDNA3 control vector under normoxia were used as the baseline control. The asterisk (\*) indicated statistical significance ( $P<0.05$ ) between experimental and control groups.

(u) No activation of the reporter gene construct by hypoxia was shown when the reporter construct was transfected into the enzymatically inactive METTL4 mutant FADU and BFTC909 cells. The reporter construct contained the 6mA consensus sequence (25230 to 25239, start from the *ZMIZ1* gene) in the intron 1 region (24990 to 25469, start from the *ZMIZ1* gene) of *ZMIZ1* gene. N, normoxia; H, hypoxia. The luciferase/renilla activities of the wild type cells transfected with reporter construct under normoxia were used as the baseline control. The asterisk (\*) indicated statistical significance ( $P<0.05$ ) between experimental and control conditions. N.S.: not statistically significant.

(v) Real-time PCR assays confirmed the activation of two hypoxia-regulated target genes (*CTNNA1*, *PIK3CA*) induced by hypoxia or METTL4 overexpression in FADU or BFTC909 cells. The asterisk (\*) indicated statistical significance ( $P<0.05$ ) between experimental and control groups. N, normoxia; H, hypoxia. Normoxic condition and the cell clone transfected with the control vector were used as a control.



(w) MeDIP assays showed the presence of 6mA site on the intron 10 of *CTNNA1* gene and the intron 6 of the *PIK3CA* gene. The red-inked labeling indicated the 6mA consensus sequence in the intronic regions of the HIF-1 $\alpha$  indirect target genes. METTL4 increased the 6mA levels on the oligonucleotides containing the 6mA consensus motifs of the intron 10 region of *CTNNA1*, and intron 6 region of *PIK3CA* using *in vitro* DNA methylation assays, whereas no increased 6mA levels could be shown on the oligonucleotides containing mutated 6mA sequences. The oligonucleotide only was used as a control. The asterisk (\*) indicated statistical significance ( $P < 0.05$ ) between experimental and control groups. Corresponding 6mA dot blots with methyl blue loading controls were shown together with bar graphs.

(x) Real-time PCR assays confirmed the activation of five hypoxia-regulated target genes (*DAAMI*, *LEPREL1*, *XPNPEP1*, *TBC1D23*, and *TNIP1*) induced by hypoxia or METTL4 overexpression in FADU or BFTC909 cells. The asterisk (\*) indicated statistical significance ( $P < 0.05$ ) between experimental and control groups. N, normoxia; H, hypoxia. Normoxic condition and the cell clone transfected with the control vector were used as a control.

(y) The gene tracks of 5 hypoxia/METTL4 co-regulated genes with their sites of 6mA deposition (*DAAMI*, *LEPREL1*, *XPNPEP1*, *TBC1D23*, and *TNIP1*) were shown. All five genes contained 6mA consensus motifs in their promoter or introns.

(z) MeDIP assays confirmed the presence of 6mA sites on the genomic locations of *DAAMI*, *LEPREL1*, *XPNPEP1*, *TBC1D23*, and *TNIP1* genes in FADU and BFTC909 cells. The red-inked labeling indicated the 6mA consensus sequence in the promoter or intronic regions of these genes.

The error bars represented the standard deviation (SD). Student's *t*-test was used to compare two groups of independent samples. For details, see method section.
